# Supplementary material for: A genome-wide screening and SNPs-to-genes approach to identify novel genetic risk factors associated with frontotemporal dementia
Source: PubMed Central journal article supplement (PMC4706156; doi:10.1016/j.neurobiolaging.2015.06.005), 2015-10
Supplement: mmc1.pdf [file mmc1.pdf]

## Supporting Information

S1 Fig. Quantile-quantile (q-q) plot.

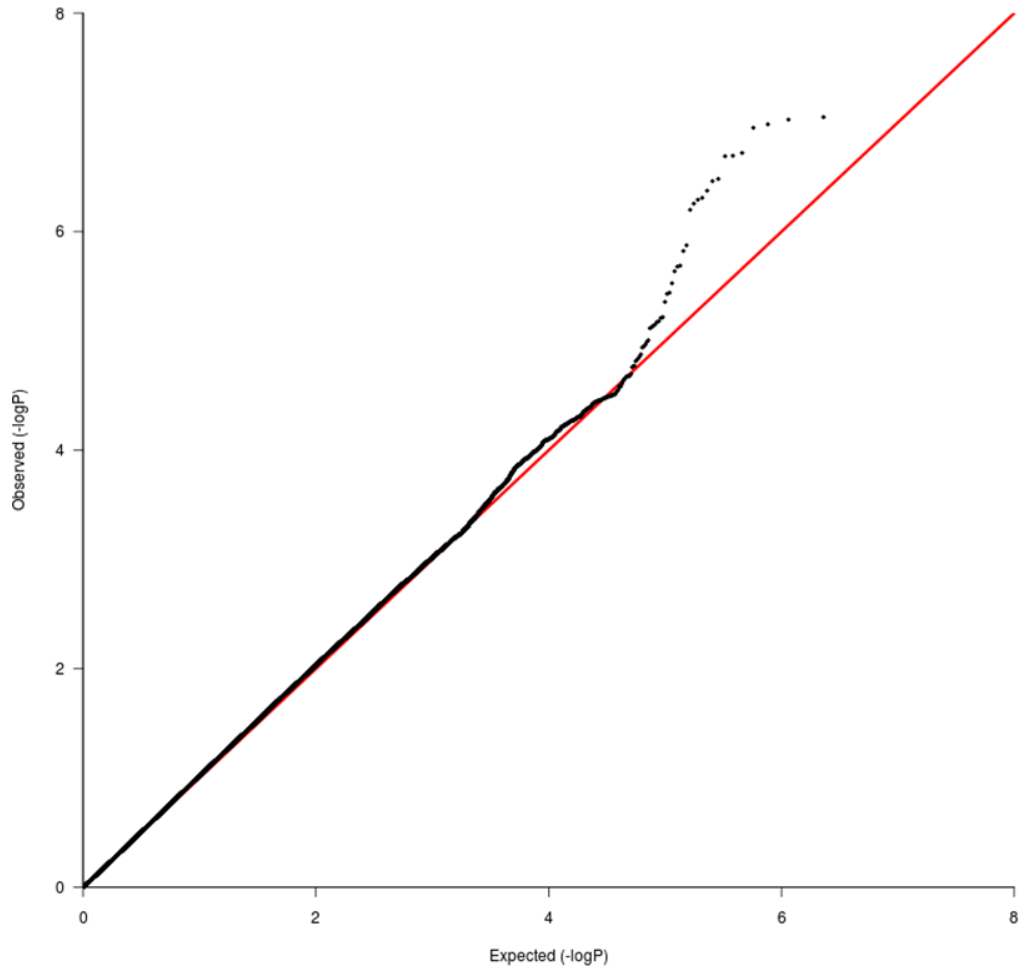

The q-q plot for expected (x-axis) vs. observed (y-axis) p-values is shown. Lambda value was = 1.095

S2 Fig. Loss of heterozygosity (LOH) analysis.

a

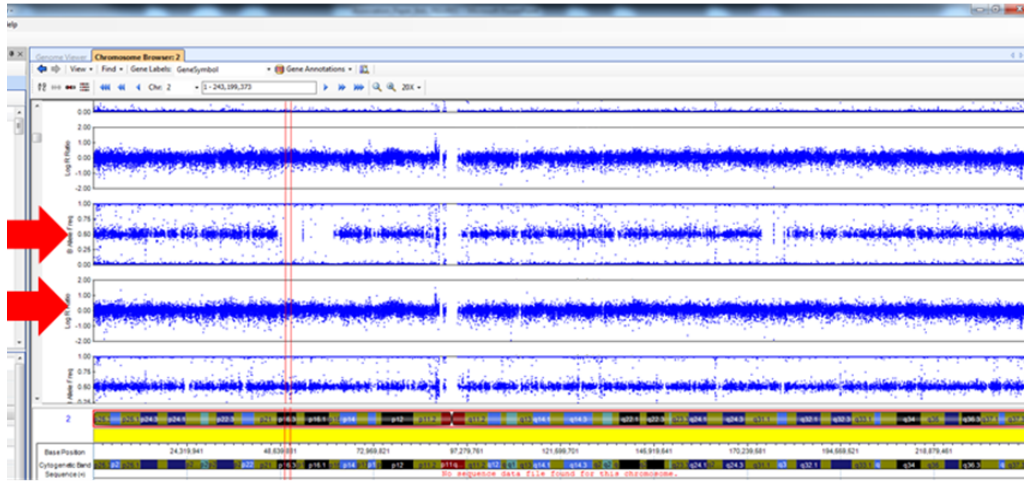

↑  
*NRXN1*  
↓

b

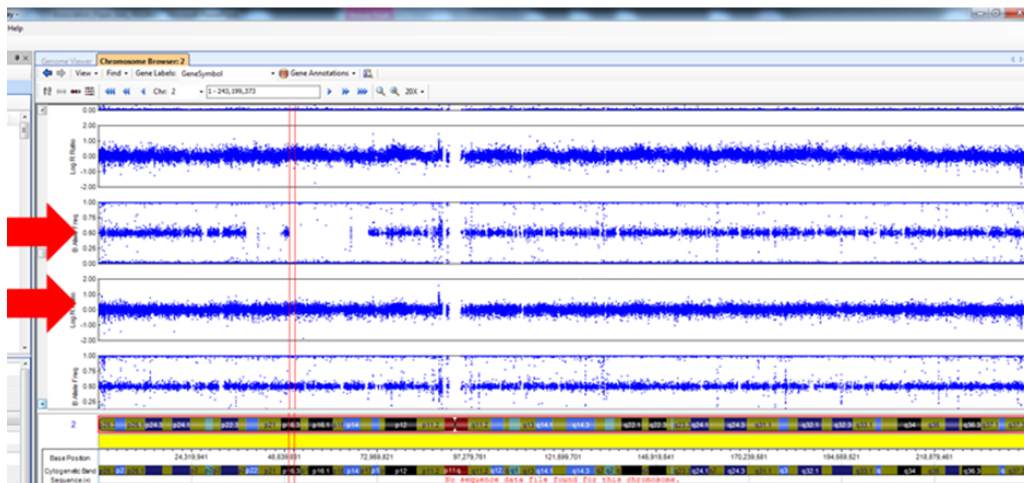

Visual analysis of the distribution of the SNPs at the *NRXN1* locus through the Illumina Genome Viewer (IGV) in Genome Studio reveals no evidence for CNVs within *NRXN1* in our sample set. An example for 2 different FTD cases (a and b) is shown.

### S3 Fig. eQTL analysis.

#### a *RFNG*

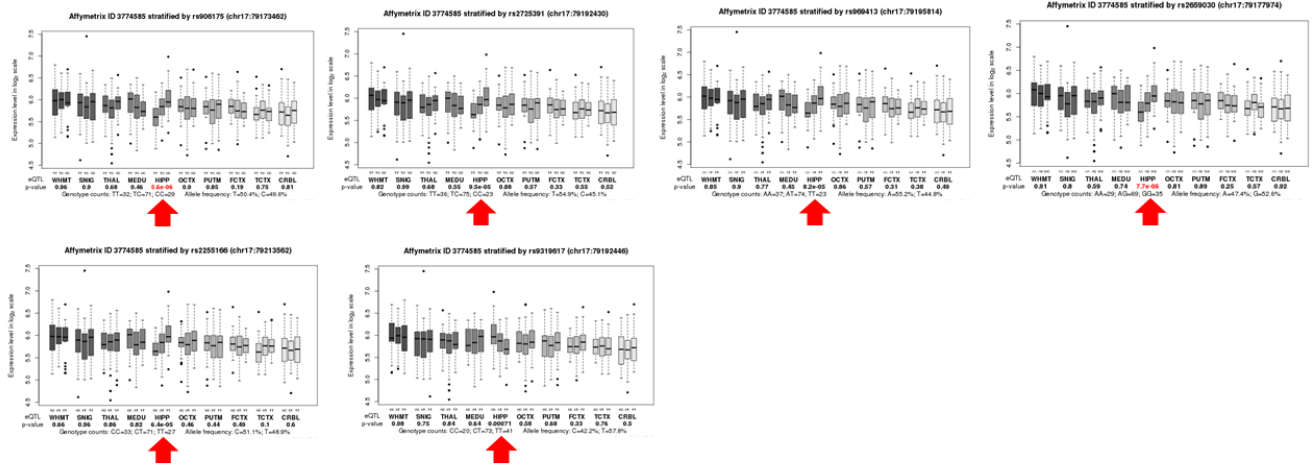

#### b *AATK & MIR1250*

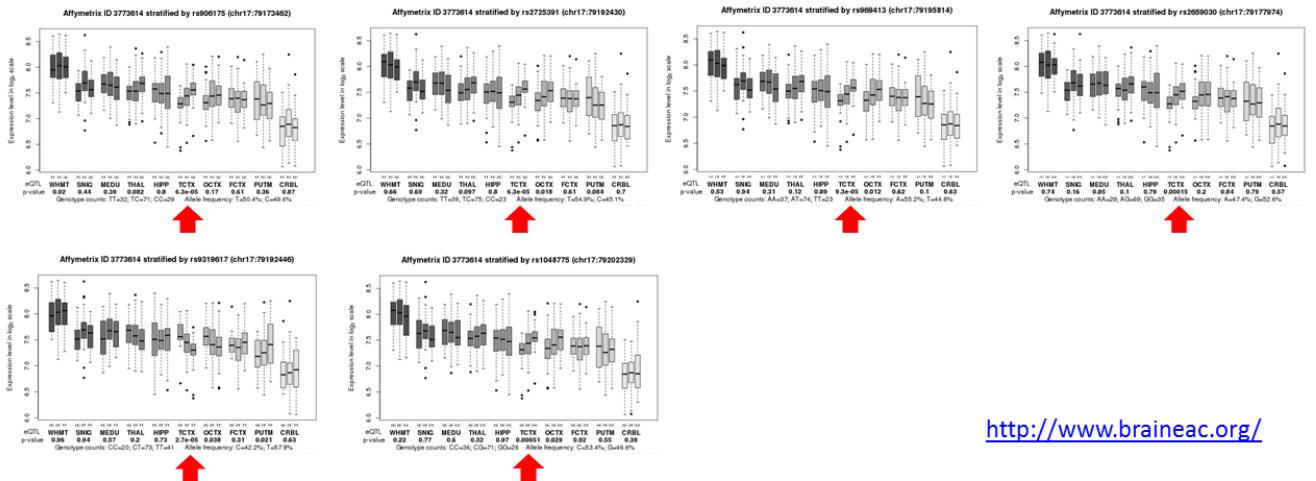

<http://www.braineac.org/>

**a)** Box plots for eQTL at the 17q25.3locus. Suggestive SNPs at this locus exerted either significant or suggestive effect on expression in the nearby *cis* gene *RFNG*. Each risk allele causes a decrease of its transcript levels. **b)** Box plots for eQTL at the 17q25.3locus. Suggestive SNPs at this locus exerted suggestive effect on expression in the nearby *cis* genes *AATK* & *MIR1250*. Each risk allele causes a decrease of their transcript levels. The box plots were obtained from <http://www.braineac.org/>.

S4 Fig. SNPs-to-genes analysis.

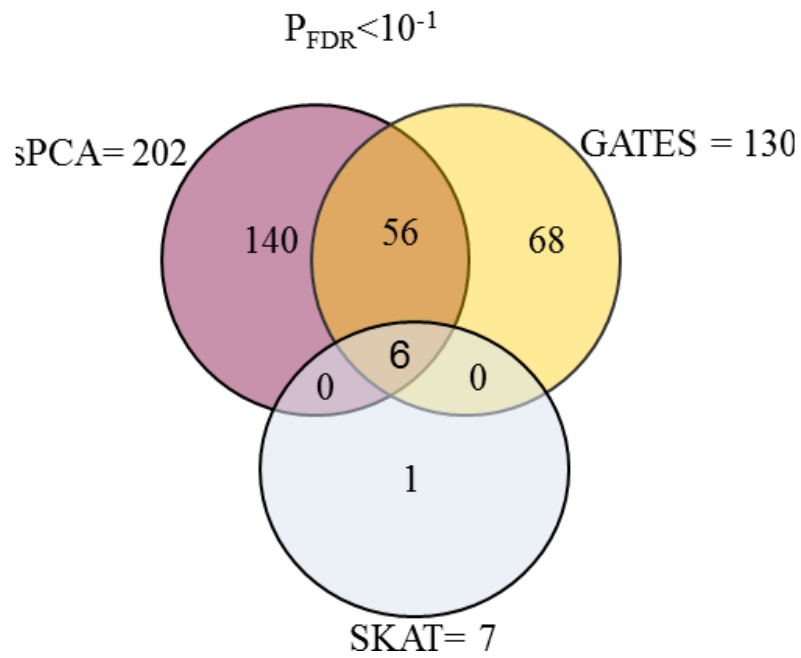

The Venn diagram shows the number of genes that were suggestive after FDR correction (p-value < 0.10) and their level of overlap across the three methods (GATES, sPCA and SKAT).

**S5 Fig. Graphic representation of functional annotation clustering (ES > 1.3).**

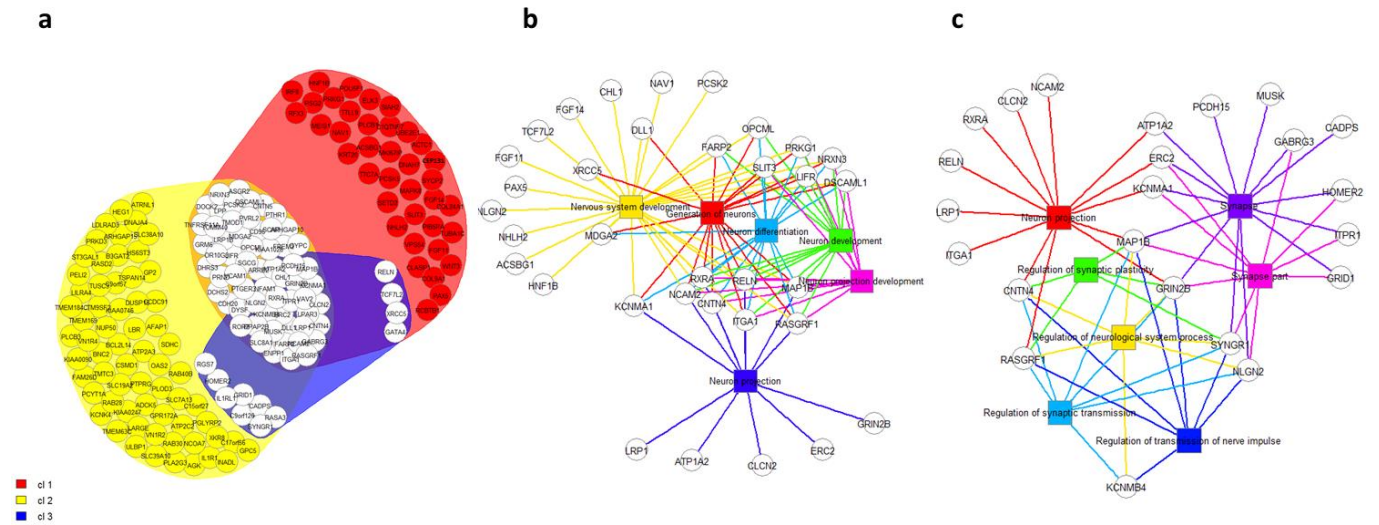

**a)** Visual distribution of the genes (DAGs) contributing to the three significant clusters. The level of gene overlap across different clusters is depicted. **b)** Visual representation of cluster 1 highlighting the brain-specific ontology terms (squares) and the relative genes (spheres). **c)** Visual representation of cluster 3 highlighting the brain-specific ontology terms (squares) and the relative genes (spheres).

**S1 Table. Genome wide association results for FTD-associated SNPs with P-value < 10<sup>-4</sup>.**

| Marker     | Chr | Bp hg19   | AI1 | A freq1 | Or al1 | AI2 | A freq2 | Or al2 | Std err | Wald chisq | Pvalue   | Lr chisq | Lr pval  | R sqr | Gene name        |
|------------|-----|-----------|-----|---------|--------|-----|---------|--------|---------|------------|----------|----------|----------|-------|------------------|
| rs906175   | 17  | 79173462  | C   | 0.52    | 0.63   | T   | 0.48    | 1.58   | 0.09    | 27.99      | 1.22E-07 | 28.59    | 8.94E-08 | 0.88  | <i>CEP131</i>    |
| rs17042852 | 2   | 52600067  | T   | 0.96    | 0.35   | C   | 0.04    | 2.82   | 0.20    | 27.02      | 2.01E-07 | 28.49    | 9.43E-08 | 0.97  | <i>LOC730100</i> |
| rs1526678  | 2   | 52635727  | A   | 0.96    | 0.35   | G   | 0.04    | 2.83   | 0.20    | 26.86      | 2.19E-07 | 28.15    | 1.12E-07 | 0.99  | <i>LOC730100</i> |
| rs17042770 | 2   | 52571393  | G   | 0.96    | 0.35   | C   | 0.04    | 2.83   | 0.20    | 26.83      | 2.22E-07 | 28.30    | 1.04E-07 | 0.96  | <i>LOC730100</i> |
| rs2725391  | 17  | 79192430  | T   | 0.48    | 1.52   | C   | 0.52    | 0.66   | 0.08    | 26.60      | 2.50E-07 | 27.13    | 1.91E-07 | 0.98  | <i>CEP131</i>    |
| rs12621157 | 2   | 52509876  | G   | 0.96    | 0.36   | T   | 0.04    | 2.75   | 0.20    | 25.83      | 3.73E-07 | 27.01    | 2.02E-07 | 0.96  | <i>LOC730100</i> |
| rs12622570 | 2   | 52546301  | G   | 0.96    | 0.36   | C   | 0.04    | 2.76   | 0.20    | 25.70      | 3.99E-07 | 27.00    | 2.04E-07 | 0.96  | <i>LOC730100</i> |
| rs969413   | 17  | 79195814  | T   | 0.51    | 0.66   | A   | 0.49    | 1.52   | 0.08    | 25.57      | 4.26E-07 | 26.07    | 3.30E-07 | 0.95  | <i>CEP131</i>    |
| rs2659030  | 17  | 79177974  | G   | 0.54    | 0.64   | A   | 0.46    | 1.56   | 0.09    | 25.50      | 4.42E-07 | 25.98    | 3.44E-07 | 0.83  | <i>CEP131</i>    |
| rs2255166  | 17  | 79213562  | T   | 0.54    | 0.65   | C   | 0.46    | 1.55   | 0.09    | 24.85      | 6.19E-07 | 25.30    | 4.90E-07 | 0.85  | <i>C17orf89</i>  |
| rs12619513 | 2   | 52532874  | G   | 0.95    | 0.40   | A   | 0.05    | 2.53   | 0.19    | 24.79      | 6.39E-07 | 25.59    | 4.22E-07 | 0.94  | <i>LOC730100</i> |
| rs9319617  | 17  | 79192446  | T   | 0.52    | 1.51   | C   | 0.48    | 0.66   | 0.08    | 24.72      | 6.62E-07 | 25.22    | 5.10E-07 | 0.97  | <i>CEP131</i>    |
| rs1048775  | 17  | 79202329  | C   | 0.50    | 1.52   | G   | 0.50    | 0.66   | 0.09    | 24.35      | 8.04E-07 | 24.82    | 6.31E-07 | 0.91  | <i>ENTHD2</i>    |
| rs12614311 | 2   | 52521716  | C   | 0.94    | 0.39   | T   | 0.06    | 2.55   | 0.19    | 24.17      | 8.83E-07 | 25.07    | 5.54E-07 | 0.81  | <i>LOC730100</i> |
| rs9896850  | 17  | 79191726  | C   | 0.54    | 1.50   | T   | 0.46    | 0.67   | 0.09    | 22.91      | 1.70E-06 | 23.38    | 1.33E-06 | 0.94  | <i>CEP131</i>    |
| rs2659005  | 17  | 79218714  | T   | 0.49    | 1.51   | C   | 0.51    | 0.66   | 0.09    | 22.75      | 1.85E-06 | 23.14    | 1.51E-06 | 0.89  | <i>SLC38A10</i>  |
| rs3110648  | 17  | 36071034  | T   | 0.82    | 0.61   | G   | 0.18    | 1.63   | 0.10    | 22.44      | 2.17E-06 | 22.51    | 2.09E-06 | 0.99  | <i>HNF1B</i>     |
| rs9912789  | 17  | 79178196  | C   | 0.54    | 1.51   | T   | 0.46    | 0.66   | 0.09    | 22.12      | 2.57E-06 | 22.55    | 2.05E-06 | 0.88  | <i>CEP131</i>    |
| rs11099660 | 4   | 148513620 | C   | 0.70    | 1.57   | T   | 0.30    | 0.64   | 0.10    | 21.57      | 3.42E-06 | 22.33    | 2.30E-06 | 0.92  | <i>TMEM184C</i>  |
| rs3110643  | 17  | 36073492  | T   | 0.84    | 0.61   | C   | 0.16    | 1.65   | 0.11    | 21.44      | 3.66E-06 | 21.46    | 3.62E-06 | 1.00  | <i>HNF1B</i>     |
| rs12939525 | 17  | 79194005  | T   | 0.55    | 1.47   | C   | 0.45    | 0.68   | 0.08    | 21.42      | 3.68E-06 | 21.84    | 2.96E-06 | 0.97  | <i>CEP131</i>    |
| rs3110642  | 17  | 36073620  | T   | 0.84    | 0.61   | C   | 0.16    | 1.64   | 0.11    | 21.40      | 3.73E-06 | 21.42    | 3.70E-06 | 1.00  | <i>HNF1B</i>     |
| rs4980079  | 10  | 81194219  | C   | 0.55    | 0.68   | T   | 0.45    | 1.46   | 0.08    | 20.78      | 5.15E-06 | 21.08    | 4.40E-06 | 0.98  | <i>ZCCHC24</i>   |
| rs7083790  | 10  | 81194629  | C   | 0.52    | 0.69   | G   | 0.48    | 1.45   | 0.08    | 20.15      | 7.17E-06 | 20.47    | 6.06E-06 | 0.99  | <i>ZCCHC24</i>   |
| rs6857     | 19  | 45392254  | C   | 0.87    | 0.59   | T   | 0.13    | 1.70   | 0.12    | 20.06      | 7.50E-06 | 20.17    | 7.09E-06 | 0.92  | <i>PVRL2</i>     |
| rs8073077  | 17  | 79195021  | C   | 0.56    | 1.44   | T   | 0.44    | 0.69   | 0.08    | 20.06      | 7.51E-06 | 20.43    | 6.18E-06 | 0.99  | <i>CEP131</i>    |
| rs4980081  | 10  | 81196683  | C   | 0.52    | 0.69   | G   | 0.48    | 1.45   | 0.08    | 19.99      | 7.80E-06 | 20.30    | 6.61E-06 | 0.99  | <i>ZCCHC24</i>   |
| rs4980083  | 10  | 81197177  | G   | 0.52    | 0.69   | T   | 0.48    | 1.45   | 0.08    | 19.95      | 7.94E-06 | 20.27    | 6.73E-06 | 0.99  | <i>ZCCHC24</i>   |
| rs7086488  | 10  | 81200432  | G   | 0.52    | 0.68   | A   | 0.48    | 1.46   | 0.09    | 19.81      | 8.54E-06 | 20.13    | 7.25E-06 | 0.93  | <i>ZCCHC24</i>   |
| rs9643128  | 8   | 119445101 | T   | 0.64    | 0.68   | C   | 0.36    | 1.47   | 0.09    | 19.38      | 1.07E-05 | 19.54    | 9.86E-06 | 0.89  | <i>SAMD12</i>    |
| rs10172083 | 2   | 40795847  | G   | 0.95    | 0.42   | T   | 0.05    | 2.36   | 0.20    | 19.31      | 1.11E-05 | 19.47    | 1.02E-05 | 0.85  | <i>SLC8A1</i>    |
| rs1495158  | 4   | 11517692  | T   | 0.72    | 0.67   | G   | 0.28    | 1.50   | 0.09    | 19.27      | 1.13E-05 | 19.36    | 1.08E-05 | 0.93  |                  |
| rs9997161  | 4   | 11516724  | G   | 0.72    | 0.67   | A   | 0.28    | 1.48   | 0.09    | 19.17      | 1.20E-05 | 19.26    | 1.14E-05 | 0.96  |                  |
| rs13092573 | 3   | 46988561  | C   | 0.69    | 0.66   | T   | 0.31    | 1.51   | 0.09    | 19.10      | 1.24E-05 | 19.28    | 1.13E-05 | 0.86  | <i>CCDC12</i>    |
| rs10190079 | 2   | 52514065  | A   | 0.83    | 0.63   | G   | 0.17    | 1.59   | 0.11    | 18.95      | 1.34E-05 | 18.97    | 1.33E-05 | 0.97  |                  |
| rs295433   | 3   | 47362080  | C   | 0.67    | 0.67   | T   | 0.33    | 1.49   | 0.09    | 18.63      | 1.58E-05 | 18.81    | 1.45E-05 | 0.84  | <i>KLHL18</i>    |
| rs7893556  | 10  | 16771273  | C   | 0.51    | 1.41   | T   | 0.49    | 0.71   | 0.08    | 18.42      | 1.78E-05 | 18.69    | 1.54E-05 | 0.99  | <i>RSU1</i>      |
| rs12467265 | 2   | 40791633  | C   | 0.95    | 0.44   | T   | 0.05    | 2.28   | 0.19    | 18.35      | 1.84E-05 | 18.51    | 1.69E-05 | 0.84  | <i>SLC8A1</i>    |
| rs12467166 | 2   | 40791221  | G   | 0.95    | 0.44   | A   | 0.05    | 2.28   | 0.19    | 18.34      | 1.85E-05 | 18.50    | 1.70E-05 | 0.85  | <i>SLC8A1</i>    |
| rs7599354  | 2   | 127443771 | T   | 0.70    | 1.48   | G   | 0.30    | 0.67   | 0.09    | 18.18      | 2.02E-05 | 18.75    | 1.49E-05 | 0.93  | <i>GYPC</i>      |
| rs2075650  | 19  | 45395619  | A   | 0.88    | 0.61   | G   | 0.12    | 1.65   | 0.12    | 18.10      | 2.10E-05 | 18.18    | 2.01E-05 | 1.00  | <i>TOMM40</i>    |

| Marker     | Chr | Bp hg19   | Al1 | A freq1 | Or al1 | Al2 | A freq2 | Or al2 | Std err | Wald chisq | Pvalue   | Lr chisq | Lr pval  | R sq | Gene name |
|------------|-----|-----------|-----|---------|--------|-----|---------|--------|---------|------------|----------|----------|----------|------|-----------|
| rs17026205 | 2   | 40787615  | C   | 0.95    | 0.46   | G   | 0.05    | 2.20   | 0.19    | 17.96      | 2.26E-05 | 18.12    | 2.08E-05 | 0.98 | SLC8A1    |
| rs12712694 | 2   | 40788070  | C   | 0.95    | 0.46   | T   | 0.05    | 2.20   | 0.19    | 17.94      | 2.28E-05 | 18.10    | 2.10E-05 | 0.98 | SLC8A1    |
| rs13431385 | 2   | 40787911  | C   | 0.95    | 0.46   | T   | 0.05    | 2.20   | 0.19    | 17.94      | 2.28E-05 | 18.10    | 2.10E-05 | 0.98 | SLC8A1    |
| rs12712695 | 2   | 40788108  | G   | 0.95    | 0.46   | C   | 0.05    | 2.20   | 0.19    | 17.93      | 2.29E-05 | 18.09    | 2.11E-05 | 0.98 | SLC8A1    |
| rs10788470 | 10  | 87687364  | T   | 0.55    | 0.71   | C   | 0.45    | 1.41   | 0.08    | 17.76      | 2.51E-05 | 17.98    | 2.23E-05 | 1.00 | GRID1     |
| rs13251354 | 8   | 119437946 | T   | 0.69    | 0.69   | C   | 0.31    | 1.46   | 0.09    | 17.59      | 2.75E-05 | 17.69    | 2.61E-05 | 0.91 | SAMD12    |
| rs11994945 | 8   | 119437743 | C   | 0.69    | 0.69   | T   | 0.31    | 1.46   | 0.09    | 17.58      | 2.75E-05 | 17.69    | 2.61E-05 | 0.91 | SAMD12    |
| rs13253470 | 8   | 119438012 | C   | 0.69    | 0.69   | T   | 0.31    | 1.46   | 0.09    | 17.58      | 2.75E-05 | 17.68    | 2.61E-05 | 0.91 | SAMD12    |
| rs7924131  | 10  | 87694876  | C   | 0.56    | 0.71   | G   | 0.45    | 1.41   | 0.08    | 17.57      | 2.77E-05 | 17.79    | 2.47E-05 | 1.00 | GRID1     |
| rs9309056  | 2   | 40783406  | T   | 0.90    | 0.58   | C   | 0.10    | 1.74   | 0.13    | 17.51      | 2.86E-05 | 17.46    | 2.93E-05 | 0.97 | SLC8A1    |
| rs16929633 | 9   | 12823504  | C   | 0.88    | 0.61   | T   | 0.12    | 1.64   | 0.12    | 17.42      | 2.99E-05 | 17.40    | 3.03E-05 | 1.00 | LURAP1L   |
| rs16929631 | 9   | 12822891  | G   | 0.88    | 0.61   | A   | 0.12    | 1.64   | 0.12    | 17.38      | 3.06E-05 | 17.36    | 3.10E-05 | 1.00 | LURAP1L   |
| rs7923344  | 10  | 87695016  | G   | 0.56    | 0.71   | A   | 0.44    | 1.41   | 0.08    | 17.34      | 3.12E-05 | 17.55    | 2.80E-05 | 1.00 | GRID1     |
| rs13427887 | 2   | 40786826  | G   | 0.95    | 0.47   | A   | 0.05    | 2.15   | 0.18    | 17.33      | 3.15E-05 | 17.51    | 2.86E-05 | 1.00 | SLC8A1    |
| rs13040963 | 20  | 62027516  | A   | 0.77    | 1.53   | T   | 0.23    | 0.65   | 0.10    | 17.32      | 3.16E-05 | 17.95    | 2.26E-05 | 0.93 |           |
| rs6122435  | 20  | 62022805  | T   | 0.76    | 1.53   | C   | 0.24    | 0.65   | 0.10    | 17.23      | 3.31E-05 | 17.87    | 2.37E-05 | 0.91 |           |
| rs13390203 | 2   | 40786740  | T   | 0.95    | 0.47   | A   | 0.05    | 2.14   | 0.18    | 17.19      | 3.39E-05 | 17.36    | 3.09E-05 | 1.00 | SLC8A1    |
| rs10172665 | 2   | 40790377  | G   | 0.95    | 0.45   | A   | 0.05    | 2.20   | 0.19    | 17.17      | 3.41E-05 | 17.30    | 3.20E-05 | 0.92 | SLC8A1    |
| rs10169639 | 2   | 40789912  | C   | 0.95    | 0.46   | T   | 0.05    | 2.20   | 0.19    | 17.17      | 3.42E-05 | 17.29    | 3.21E-05 | 0.92 | SLC8A1    |
| rs16867695 | 5   | 38752991  | G   | 0.90    | 0.59   | A   | 0.10    | 1.69   | 0.13    | 17.17      | 3.43E-05 | 17.11    | 3.53E-05 | 1.00 |           |
| rs10195941 | 2   | 40790362  | A   | 0.95    | 0.46   | C   | 0.05    | 2.20   | 0.19    | 17.16      | 3.43E-05 | 17.28    | 3.22E-05 | 0.92 | SLC8A1    |
| rs2042019  | 2   | 40789687  | A   | 0.95    | 0.46   | C   | 0.05    | 2.20   | 0.19    | 17.15      | 3.45E-05 | 17.28    | 3.23E-05 | 0.92 | SLC8A1    |
| rs2042020  | 2   | 40789577  | C   | 0.95    | 0.46   | T   | 0.05    | 2.20   | 0.19    | 17.15      | 3.46E-05 | 17.27    | 3.24E-05 | 0.92 | SLC8A1    |
| rs16867658 | 5   | 38727345  | C   | 0.90    | 0.59   | A   | 0.10    | 1.69   | 0.13    | 17.13      | 3.48E-05 | 17.08    | 3.59E-05 | 1.00 |           |
| rs10857968 | 1   | 109367944 | A   | 0.48    | 0.73   | G   | 0.52    | 1.38   | 0.08    | 17.11      | 3.53E-05 | 17.36    | 3.09E-05 | 0.99 | AKNAD1    |
| rs10055279 | 5   | 38725043  | A   | 0.90    | 0.59   | C   | 0.10    | 1.69   | 0.13    | 17.08      | 3.59E-05 | 17.02    | 3.70E-05 | 1.00 |           |
| rs10070418 | 5   | 38724924  | C   | 0.90    | 0.59   | G   | 0.10    | 1.69   | 0.13    | 17.08      | 3.59E-05 | 17.02    | 3.70E-05 | 1.00 |           |
| rs1338526  | 1   | 109368249 | C   | 0.48    | 0.73   | G   | 0.52    | 1.38   | 0.08    | 17.07      | 3.61E-05 | 17.32    | 3.16E-05 | 0.99 | AKNAD1    |
| rs4952420  | 2   | 40786196  | G   | 0.95    | 0.47   | A   | 0.05    | 2.14   | 0.18    | 17.06      | 3.61E-05 | 17.24    | 3.30E-05 | 0.98 | SLC8A1    |
| rs4952419  | 2   | 40786134  | C   | 0.95    | 0.47   | T   | 0.05    | 2.14   | 0.18    | 17.06      | 3.62E-05 | 17.23    | 3.31E-05 | 0.98 | SLC8A1    |
| rs10198424 | 2   | 40796445  | A   | 0.97    | 0.37   | C   | 0.03    | 2.68   | 0.24    | 17.06      | 3.62E-05 | 17.08    | 3.59E-05 | 0.82 | SLC8A1    |
| rs11642286 | 16  | 85921609  | A   | 0.96    | 2.86   | G   | 0.04    | 0.35   | 0.25    | 17.06      | 3.63E-05 | 20.06    | 7.51E-06 | 0.87 |           |
| rs1145789  | 6   | 91623879  | T   | 0.79    | 0.66   | C   | 0.21    | 1.51   | 0.10    | 17.05      | 3.64E-05 | 17.05    | 3.64E-05 | 1.00 |           |
| rs7893906  | 10  | 87697526  | T   | 0.56    | 0.71   | C   | 0.44    | 1.40   | 0.08    | 17.04      | 3.65E-05 | 17.24    | 3.29E-05 | 0.99 | GRID1     |
| rs13401944 | 2   | 40786575  | A   | 0.95    | 0.47   | G   | 0.05    | 2.13   | 0.18    | 17.04      | 3.66E-05 | 17.21    | 3.35E-05 | 1.00 | SLC8A1    |
| rs13402063 | 2   | 40786694  | A   | 0.95    | 0.47   | G   | 0.05    | 2.13   | 0.18    | 17.04      | 3.67E-05 | 17.20    | 3.36E-05 | 1.00 | SLC8A1    |
| rs2042021  | 2   | 40789428  | C   | 0.95    | 0.46   | T   | 0.05    | 2.16   | 0.19    | 17.00      | 3.74E-05 | 17.12    | 3.50E-05 | 0.94 | SLC8A1    |
| rs2042022  | 2   | 40789395  | G   | 0.95    | 0.46   | A   | 0.05    | 2.16   | 0.19    | 17.00      | 3.75E-05 | 17.12    | 3.51E-05 | 0.95 | SLC8A1    |
| rs17026229 | 2   | 40788939  | G   | 0.95    | 0.46   | T   | 0.05    | 2.16   | 0.19    | 16.99      | 3.76E-05 | 17.11    | 3.52E-05 | 0.95 | SLC8A1    |
| rs10178831 | 2   | 40788917  | T   | 0.95    | 0.46   | A   | 0.05    | 2.16   | 0.19    | 16.99      | 3.76E-05 | 17.11    | 3.52E-05 | 0.95 | SLC8A1    |
| rs8000919  | 13  | 103747614 | C   | 0.49    | 1.39   | A   | 0.51    | 0.72   | 0.08    | 16.98      | 3.78E-05 | 17.20    | 3.36E-05 | 1.00 |           |

| Marker     | Chr | Bp hg19   | Al1 | A freq1 | Or al1 | Al2 | A freq2 | Or al2 | Std err | Wald chisq | Pvalue   | Lr chisq | Lr pval  | R sq | Gene name      |
|------------|-----|-----------|-----|---------|--------|-----|---------|--------|---------|------------|----------|----------|----------|------|----------------|
| rs3110644  | 17  | 36073196  | T   | 0.78    | 0.67   | G   | 0.22    | 1.50   | 0.10    | 16.95      | 3.83E-05 | 16.97    | 3.80E-05 | 0.93 | <i>HNF1B</i>   |
| rs1940245  | 9   | 113522917 | C   | 0.72    | 0.69   | A   | 0.28    | 1.44   | 0.09    | 16.88      | 3.99E-05 | 16.93    | 3.88E-05 | 0.99 | <i>MUSK</i>    |
| rs12154794 | 7   | 41301890  | C   | 0.68    | 1.45   | G   | 0.32    | 0.69   | 0.09    | 16.87      | 3.99E-05 | 17.33    | 3.15E-05 | 0.92 |                |
| rs10016656 | 4   | 131603386 | C   | 0.80    | 0.67   | T   | 0.20    | 1.50   | 0.10    | 16.86      | 4.02E-05 | 16.83    | 4.08E-05 | 0.96 |                |
| rs9297402  | 8   | 108853863 | T   | 0.92    | 0.55   | C   | 0.08    | 1.83   | 0.15    | 16.85      | 4.04E-05 | 16.81    | 4.14E-05 | 0.99 |                |
| rs10187793 | 2   | 40796854  | T   | 0.97    | 0.38   | C   | 0.03    | 2.66   | 0.24    | 16.83      | 4.09E-05 | 16.84    | 4.08E-05 | 0.82 | <i>SLC8A1</i>  |
| rs4680748  | 3   | 28293360  | G   | 0.70    | 1.45   | C   | 0.30    | 0.69   | 0.09    | 16.83      | 4.09E-05 | 17.30    | 3.20E-05 | 0.98 | <i>CMC1</i>    |
| rs17026180 | 2   | 40783776  | A   | 0.94    | 0.48   | C   | 0.06    | 2.08   | 0.18    | 16.83      | 4.10E-05 | 16.99    | 3.75E-05 | 0.84 | <i>SLC8A1</i>  |
| rs1338525  | 1   | 109368333 | G   | 0.48    | 0.73   | A   | 0.52    | 1.38   | 0.08    | 16.82      | 4.11E-05 | 17.07    | 3.61E-05 | 0.98 | <i>AKNAD1</i>  |
| rs11986704 | 8   | 108842979 | G   | 0.92    | 0.55   | T   | 0.08    | 1.83   | 0.15    | 16.75      | 4.26E-05 | 16.70    | 4.37E-05 | 0.97 |                |
| rs13260753 | 8   | 119438828 | C   | 0.69    | 0.70   | A   | 0.31    | 1.43   | 0.09    | 16.75      | 4.27E-05 | 16.82    | 4.10E-05 | 0.96 | <i>SAMD12</i>  |
| rs937295   | 8   | 108848708 | G   | 0.92    | 0.55   | A   | 0.08    | 1.83   | 0.15    | 16.74      | 4.28E-05 | 16.69    | 4.40E-05 | 0.98 |                |
| rs7835295  | 8   | 119468609 | A   | 0.70    | 0.70   | G   | 0.30    | 1.42   | 0.09    | 16.70      | 4.38E-05 | 16.77    | 4.22E-05 | 1.00 | <i>SAMD12</i>  |
| rs1016598  | 6   | 5159417   | G   | 0.66    | 1.47   | A   | 0.34    | 0.68   | 0.09    | 16.69      | 4.40E-05 | 17.08    | 3.59E-05 | 0.86 | <i>LYRM4</i>   |
| rs1565924  | 4   | 11511452  | A   | 0.65    | 0.71   | G   | 0.35    | 1.41   | 0.08    | 16.67      | 4.45E-05 | 16.78    | 4.21E-05 | 1.00 |                |
| rs4629902  | 8   | 119444843 | C   | 0.69    | 0.70   | A   | 0.31    | 1.43   | 0.09    | 16.63      | 4.54E-05 | 16.70    | 4.37E-05 | 0.97 | <i>SAMD12</i>  |
| rs4492409  | 8   | 119444880 | T   | 0.69    | 0.70   | C   | 0.31    | 1.43   | 0.09    | 16.62      | 4.57E-05 | 16.69    | 4.40E-05 | 0.97 | <i>SAMD12</i>  |
| rs16867700 | 5   | 38754629  | C   | 0.90    | 0.60   | T   | 0.10    | 1.68   | 0.13    | 16.59      | 4.65E-05 | 16.52    | 4.81E-05 | 0.98 |                |
| rs9425178  | 1   | 80673138  | C   | 0.59    | 0.71   | T   | 0.41    | 1.42   | 0.09    | 16.59      | 4.65E-05 | 16.77    | 4.23E-05 | 0.96 |                |
| rs6122434  | 20  | 62014997  | G   | 0.78    | 1.51   | A   | 0.22    | 0.66   | 0.10    | 16.56      | 4.70E-05 | 17.17    | 3.43E-05 | 1.00 |                |
| rs4876416  | 8   | 119446504 | T   | 0.69    | 0.70   | G   | 0.31    | 1.43   | 0.09    | 16.53      | 4.79E-05 | 16.60    | 4.61E-05 | 0.97 | <i>SAMD12</i>  |
| rs169421   | 13  | 103747532 | C   | 0.47    | 1.39   | A   | 0.53    | 0.72   | 0.08    | 16.47      | 4.94E-05 | 16.66    | 4.48E-05 | 1.00 |                |
| rs12024171 | 1   | 14567691  | T   | 0.68    | 1.43   | C   | 0.32    | 0.70   | 0.09    | 16.45      | 4.99E-05 | 16.87    | 4.00E-05 | 1.00 |                |
| rs3110645  | 17  | 36073176  | T   | 0.79    | 0.67   | G   | 0.21    | 1.50   | 0.10    | 16.45      | 4.99E-05 | 16.45    | 4.99E-05 | 0.95 | <i>HNF1B</i>   |
| rs2460842  | 15  | 36178462  | G   | 0.80    | 0.67   | A   | 0.20    | 1.48   | 0.10    | 16.44      | 5.03E-05 | 16.42    | 5.07E-05 | 1.00 |                |
| rs6469747  | 8   | 119465210 | G   | 0.70    | 0.70   | A   | 0.30    | 1.42   | 0.09    | 16.43      | 5.05E-05 | 16.50    | 4.88E-05 | 1.00 | <i>SAMD12</i>  |
| rs1194743  | 10  | 54212597  | C   | 0.72    | 1.47   | T   | 0.28    | 0.68   | 0.09    | 16.42      | 5.08E-05 | 16.86    | 4.03E-05 | 0.97 |                |
| rs4876845  | 8   | 119464447 | G   | 0.70    | 0.70   | A   | 0.30    | 1.42   | 0.09    | 16.40      | 5.12E-05 | 16.47    | 4.94E-05 | 1.00 | <i>SAMD12</i>  |
| rs3918310  | 13  | 102609607 | C   | 0.77    | 0.68   | T   | 0.23    | 1.47   | 0.10    | 16.39      | 5.16E-05 | 16.39    | 5.15E-05 | 0.96 | <i>FGF14</i>   |
| rs7810180  | 7   | 52516860  | G   | 0.66    | 1.42   | A   | 0.34    | 0.70   | 0.09    | 16.35      | 5.27E-05 | 16.75    | 4.26E-05 | 0.99 |                |
| rs7667982  | 4   | 7936522   | A   | 0.88    | 0.61   | G   | 0.12    | 1.63   | 0.12    | 16.35      | 5.27E-05 | 16.31    | 5.36E-05 | 1.00 | <i>AFAP1</i>   |
| rs10981589 | 9   | 115759519 | G   | 0.95    | 2.46   | A   | 0.05    | 0.41   | 0.22    | 16.32      | 5.36E-05 | 18.89    | 1.39E-05 | 0.99 | <i>ZNF883</i>  |
| rs4876840  | 8   | 119463071 | G   | 0.70    | 0.71   | A   | 0.30    | 1.42   | 0.09    | 16.31      | 5.38E-05 | 16.37    | 5.20E-05 | 1.00 | <i>SAMD12</i>  |
| rs10491741 | 9   | 12799028  | C   | 0.87    | 0.63   | A   | 0.13    | 1.60   | 0.12    | 16.31      | 5.39E-05 | 16.28    | 5.48E-05 | 0.99 | <i>LURAP1L</i> |
| rs11987403 | 8   | 108856341 | A   | 0.92    | 0.55   | G   | 0.08    | 1.81   | 0.15    | 16.27      | 5.48E-05 | 16.22    | 5.65E-05 | 0.98 |                |
| rs1425118  | 2   | 216958899 | C   | 0.75    | 0.69   | G   | 0.25    | 1.44   | 0.09    | 16.24      | 5.60E-05 | 16.31    | 5.38E-05 | 0.99 | <i>TMEM169</i> |
| rs6982369  | 8   | 119470962 | G   | 0.70    | 0.70   | A   | 0.30    | 1.43   | 0.09    | 16.23      | 5.61E-05 | 16.29    | 5.43E-05 | 0.94 | <i>SAMD12</i>  |
| rs7737513  | 5   | 136028557 | G   | 0.57    | 1.39   | C   | 0.43    | 0.72   | 0.08    | 16.19      | 5.72E-05 | 16.49    | 4.89E-05 | 1.00 |                |
| rs1858909  | 5   | 136030301 | T   | 0.57    | 1.39   | C   | 0.43    | 0.72   | 0.08    | 16.18      | 5.77E-05 | 16.47    | 4.94E-05 | 1.00 |                |
| rs4380648  | 5   | 136029849 | C   | 0.57    | 1.39   | T   | 0.43    | 0.72   | 0.08    | 16.18      | 5.77E-05 | 16.47    | 4.95E-05 | 1.00 |                |
| rs13106050 | 4   | 11480372  | G   | 0.63    | 0.71   | A   | 0.37    | 1.42   | 0.09    | 16.14      | 5.88E-05 | 16.24    | 5.58E-05 | 0.93 |                |



| Marker     | Chr | Bp hg19   | Al1 | A freq1 | Or al1 | Al2 | A freq2 | Or al2 | Std err | Wald chisq | Pvalue   | Lr chisq | Lr pval  | R sq | Gene name |
|------------|-----|-----------|-----|---------|--------|-----|---------|--------|---------|------------|----------|----------|----------|------|-----------|
| rs13251719 | 8   | 119438089 | T   | 0.66    | 0.71   | C   | 0.34    | 1.42   | 0.09    | 16.14      | 5.89E-05 | 16.23    | 5.62E-05 | 0.93 | SAMD12    |
| rs2037347  | 15  | 78558509  | A   | 0.83    | 0.66   | G   | 0.17    | 1.52   | 0.10    | 16.13      | 5.92E-05 | 16.08    | 6.08E-05 | 1.00 | DNAJA4    |
| rs7049103  | 9   | 3824004   | G   | 0.89    | 1.77   | A   | 0.11    | 0.57   | 0.14    | 16.12      | 5.94E-05 | 17.14    | 3.48E-05 | 0.97 | GLIS3     |
| rs1389983  | 8   | 108856834 | C   | 0.92    | 0.55   | T   | 0.08    | 1.81   | 0.15    | 16.12      | 5.96E-05 | 16.06    | 6.15E-05 | 0.98 |           |
| rs2305638  | 3   | 47046842  | C   | 0.51    | 1.39   | G   | 0.49    | 0.72   | 0.08    | 16.08      | 6.08E-05 | 16.30    | 5.40E-05 | 0.97 | NBEAL2    |
| rs1733724  | 10  | 54223977  | G   | 0.72    | 1.45   | A   | 0.28    | 0.69   | 0.09    | 16.08      | 6.09E-05 | 16.49    | 4.90E-05 | 0.99 |           |
| rs1866658  | 2   | 127443627 | G   | 0.68    | 1.45   | A   | 0.33    | 0.69   | 0.09    | 16.07      | 6.10E-05 | 16.47    | 4.95E-05 | 0.88 | GYPC      |
| rs4737478  | 8   | 58758894  | C   | 0.82    | 0.64   | T   | 0.18    | 1.56   | 0.11    | 16.06      | 6.13E-05 | 16.06    | 6.14E-05 | 0.86 |           |
| rs13098603 | 3   | 47534109  | G   | 0.67    | 0.69   | A   | 0.33    | 1.46   | 0.09    | 16.06      | 6.15E-05 | 16.18    | 5.77E-05 | 0.81 |           |
| rs4297099  | 9   | 113476105 | C   | 0.68    | 0.72   | T   | 0.32    | 1.39   | 0.08    | 16.05      | 6.16E-05 | 16.12    | 5.96E-05 | 1.00 | MUSK      |
| rs11666877 | 19  | 46777507  | C   | 0.68    | 0.69   | G   | 0.32    | 1.45   | 0.09    | 16.04      | 6.20E-05 | 16.11    | 5.98E-05 | 0.88 |           |
| rs173549   | 16  | 84543067  | C   | 0.97    | 0.41   | T   | 0.03    | 2.44   | 0.22    | 16.04      | 6.20E-05 | 16.42    | 5.08E-05 | 0.95 |           |
| rs247856   | 16  | 84542415  | G   | 0.97    | 0.40   | T   | 0.03    | 2.48   | 0.23    | 16.03      | 6.24E-05 | 16.42    | 5.08E-05 | 0.93 |           |
| rs7348332  | 20  | 4640900   | A   | 0.98    | 0.33   | G   | 0.02    | 2.99   | 0.27    | 16.01      | 6.29E-05 | 16.49    | 4.89E-05 | 0.97 |           |
| rs4782986  | 16  | 84543409  | C   | 0.97    | 0.41   | T   | 0.03    | 2.42   | 0.22    | 16.01      | 6.30E-05 | 16.38    | 5.18E-05 | 0.96 |           |
| rs7495580  | 15  | 27466391  | A   | 0.89    | 0.61   | G   | 0.11    | 1.65   | 0.13    | 16.00      | 6.33E-05 | 15.98    | 6.41E-05 | 1.00 | GABRG3    |
| rs4782997  | 16  | 84553410  | T   | 0.97    | 0.42   | A   | 0.03    | 2.37   | 0.22    | 15.96      | 6.46E-05 | 16.34    | 5.30E-05 | 0.99 |           |
| rs17784127 | 3   | 47061700  | T   | 0.55    | 1.38   | C   | 0.45    | 0.72   | 0.08    | 15.96      | 6.47E-05 | 16.20    | 5.69E-05 | 1.00 | SETD2     |
| rs7610636  | 3   | 47064436  | A   | 0.52    | 1.38   | C   | 0.48    | 0.73   | 0.08    | 15.96      | 6.47E-05 | 16.19    | 5.74E-05 | 1.00 | SETD2     |
| rs1545195  | 7   | 41307633  | T   | 0.70    | 1.42   | A   | 0.30    | 0.70   | 0.09    | 15.96      | 6.49E-05 | 16.38    | 5.19E-05 | 0.99 |           |
| rs4782990  | 16  | 84544538  | A   | 0.97    | 0.42   | G   | 0.03    | 2.39   | 0.22    | 15.95      | 6.49E-05 | 16.32    | 5.36E-05 | 0.97 |           |
| rs4782991  | 16  | 84544818  | G   | 0.97    | 0.42   | A   | 0.03    | 2.38   | 0.22    | 15.95      | 6.51E-05 | 16.31    | 5.37E-05 | 0.97 |           |
| rs2385867  | 3   | 47059323  | T   | 0.52    | 1.38   | C   | 0.48    | 0.72   | 0.08    | 15.94      | 6.53E-05 | 16.17    | 5.80E-05 | 1.00 | SETD2     |
| rs11920354 | 3   | 47262246  | C   | 0.56    | 1.38   | A   | 0.44    | 0.73   | 0.08    | 15.94      | 6.54E-05 | 16.19    | 5.72E-05 | 1.00 |           |
| rs11768187 | 7   | 41304710  | C   | 0.70    | 1.42   | T   | 0.30    | 0.70   | 0.09    | 15.92      | 6.60E-05 | 16.34    | 5.28E-05 | 0.99 |           |
| rs4782998  | 16  | 84553507  | G   | 0.97    | 0.42   | T   | 0.03    | 2.36   | 0.22    | 15.92      | 6.60E-05 | 16.30    | 5.42E-05 | 0.99 |           |
| rs7632501  | 3   | 47268306  | T   | 0.56    | 1.38   | C   | 0.44    | 0.73   | 0.08    | 15.92      | 6.62E-05 | 16.17    | 5.79E-05 | 1.00 | KIF9      |
| rs11715121 | 3   | 47072621  | T   | 0.55    | 1.38   | A   | 0.45    | 0.73   | 0.08    | 15.89      | 6.73E-05 | 16.13    | 5.93E-05 | 1.00 | SETD2     |
| rs4782999  | 16  | 84553537  | G   | 0.97    | 0.42   | C   | 0.03    | 2.36   | 0.22    | 15.88      | 6.75E-05 | 16.25    | 5.54E-05 | 0.99 |           |
| rs6768221  | 3   | 47296899  | C   | 0.56    | 1.38   | G   | 0.44    | 0.73   | 0.08    | 15.87      | 6.78E-05 | 16.12    | 5.93E-05 | 0.99 | KIF9      |
| rs7611348  | 3   | 2921102   | A   | 0.65    | 0.72   | G   | 0.35    | 1.40   | 0.08    | 15.87      | 6.78E-05 | 15.95    | 6.52E-05 | 0.98 | CNTN4     |
| rs12672313 | 7   | 115956430 | C   | 0.87    | 1.66   | A   | 0.13    | 0.60   | 0.13    | 15.86      | 6.82E-05 | 16.84    | 4.07E-05 | 0.99 |           |
| rs11130126 | 3   | 47306894  | A   | 0.56    | 1.38   | G   | 0.44    | 0.73   | 0.08    | 15.86      | 6.82E-05 | 16.11    | 5.97E-05 | 0.99 | KIF9      |
| rs10955877 | 8   | 119436884 | A   | 0.71    | 0.70   | G   | 0.29    | 1.43   | 0.09    | 15.86      | 6.82E-05 | 15.92    | 6.62E-05 | 0.95 | SAMD12    |
| rs952133   | 1   | 56859419  | C   | 0.94    | 0.52   | A   | 0.06    | 1.94   | 0.17    | 15.86      | 6.83E-05 | 15.69    | 7.47E-05 | 1.00 |           |
| rs4397486  | 9   | 113478462 | G   | 0.68    | 0.72   | T   | 0.32    | 1.39   | 0.08    | 15.84      | 6.88E-05 | 15.90    | 6.67E-05 | 1.00 | MUSK      |
| rs17138596 | 7   | 115955097 | T   | 0.87    | 1.66   | C   | 0.13    | 0.60   | 0.13    | 15.84      | 6.89E-05 | 16.82    | 4.12E-05 | 0.98 |           |
| rs7826257  | 8   | 119461395 | G   | 0.70    | 0.71   | A   | 0.30    | 1.41   | 0.09    | 15.83      | 6.92E-05 | 15.89    | 6.71E-05 | 1.00 | SAMD12    |
| rs11920853 | 3   | 47308183  | G   | 0.56    | 1.38   | A   | 0.44    | 0.73   | 0.08    | 15.82      | 6.95E-05 | 16.07    | 6.09E-05 | 0.99 | KIF9      |
| rs16974016 | 16  | 84549970  | G   | 0.97    | 0.43   | A   | 0.03    | 2.34   | 0.21    | 15.82      | 6.95E-05 | 16.18    | 5.77E-05 | 1.00 |           |
| rs10266118 | 7   | 52520577  | T   | 0.69    | 1.44   | C   | 0.31    | 0.70   | 0.09    | 15.82      | 6.97E-05 | 16.24    | 5.59E-05 | 0.93 |           |

| Marker     | Chr | Bp hg19   | Al1 | A freq1 | Or al1 | Al2 | A freq2 | Or al2 | Std err | Wald chisq | Pvalue   | Lr chisq | Lr pval  | R sq | Gene name |
|------------|-----|-----------|-----|---------|--------|-----|---------|--------|---------|------------|----------|----------|----------|------|-----------|
| rs4864014  | 4   | 131599180 | A   | 0.80    | 0.68   | G   | 0.21    | 1.47   | 0.10    | 15.81      | 6.99E-05 | 15.78    | 7.11E-05 | 1.00 |           |
| rs7825963  | 8   | 119461193 | C   | 0.70    | 0.71   | A   | 0.30    | 1.41   | 0.09    | 15.81      | 7.00E-05 | 15.87    | 6.79E-05 | 1.00 | SAMD12    |
| rs4863834  | 4   | 131599136 | G   | 0.79    | 0.68   | T   | 0.21    | 1.47   | 0.10    | 15.80      | 7.02E-05 | 15.77    | 7.15E-05 | 1.00 |           |
| rs11915074 | 3   | 47309757  | A   | 0.56    | 1.38   | T   | 0.44    | 0.73   | 0.08    | 15.80      | 7.04E-05 | 16.05    | 6.17E-05 | 0.99 | KIF9      |
| rs10092441 | 8   | 108858606 | T   | 0.92    | 0.56   | C   | 0.08    | 1.80   | 0.15    | 15.79      | 7.08E-05 | 15.72    | 7.33E-05 | 0.98 |           |
| rs10955886 | 8   | 119459334 | C   | 0.70    | 0.71   | G   | 0.30    | 1.41   | 0.09    | 15.77      | 7.15E-05 | 15.83    | 6.94E-05 | 1.00 | SAMD12    |
| rs11972531 | 7   | 52519258  | A   | 0.69    | 1.43   | G   | 0.31    | 0.70   | 0.09    | 15.77      | 7.16E-05 | 16.18    | 5.76E-05 | 0.95 |           |
| rs6721207  | 2   | 216958412 | G   | 0.75    | 0.70   | A   | 0.25    | 1.43   | 0.09    | 15.76      | 7.17E-05 | 15.83    | 6.93E-05 | 0.99 | TMEM169   |
| rs17053372 | 8   | 25163078  | C   | 0.95    | 0.47   | T   | 0.05    | 2.11   | 0.19    | 15.74      | 7.28E-05 | 15.66    | 7.58E-05 | 0.83 | DOCK5     |
| rs9845728  | 3   | 47103376  | T   | 0.55    | 1.38   | C   | 0.45    | 0.73   | 0.08    | 15.73      | 7.32E-05 | 15.96    | 6.46E-05 | 1.00 | SETD2     |
| rs1004811  | 22  | 33809429  | C   | 0.62    | 1.40   | T   | 0.38    | 0.72   | 0.09    | 15.72      | 7.35E-05 | 16.01    | 6.30E-05 | 1.00 | LARGE     |
| rs247858   | 16  | 84540654  | C   | 0.97    | 0.39   | A   | 0.03    | 2.54   | 0.24    | 15.72      | 7.36E-05 | 16.11    | 5.98E-05 | 0.92 |           |
| rs9844122  | 3   | 47108330  | T   | 0.55    | 1.38   | C   | 0.45    | 0.73   | 0.08    | 15.71      | 7.37E-05 | 15.95    | 6.50E-05 | 1.00 | SETD2     |
| rs577938   | 16  | 84553973  | A   | 0.97    | 0.42   | G   | 0.03    | 2.36   | 0.22    | 15.71      | 7.37E-05 | 16.08    | 6.08E-05 | 0.99 |           |
| rs12155345 | 7   | 41301734  | A   | 0.70    | 1.42   | C   | 0.30    | 0.71   | 0.09    | 15.71      | 7.40E-05 | 16.12    | 5.96E-05 | 1.00 |           |
| rs10108907 | 8   | 119454157 | G   | 0.70    | 0.71   | A   | 0.30    | 1.41   | 0.09    | 15.70      | 7.41E-05 | 15.76    | 7.19E-05 | 1.00 | SAMD12    |
| rs10488329 | 7   | 52528988  | C   | 0.69    | 1.42   | A   | 0.31    | 0.70   | 0.09    | 15.70      | 7.44E-05 | 16.10    | 6.02E-05 | 0.97 |           |
| rs10955878 | 8   | 119440005 | T   | 0.67    | 0.71   | C   | 0.33    | 1.40   | 0.09    | 15.64      | 7.64E-05 | 15.72    | 7.33E-05 | 0.96 | SAMD12    |
| rs1528243  | 7   | 115970664 | G   | 0.87    | 1.65   | A   | 0.13    | 0.61   | 0.13    | 15.64      | 7.68E-05 | 16.58    | 4.66E-05 | 1.00 |           |
| rs12540030 | 7   | 115976844 | A   | 0.87    | 1.65   | C   | 0.13    | 0.61   | 0.13    | 15.63      | 7.70E-05 | 16.58    | 4.67E-05 | 0.99 |           |
| rs6606889  | 15  | 27467814  | G   | 0.89    | 0.61   | A   | 0.11    | 1.64   | 0.13    | 15.63      | 7.70E-05 | 15.60    | 7.82E-05 | 0.99 | GABRG3    |
| rs1205322  | 19  | 54844437  | G   | 0.44    | 0.72   | A   | 0.56    | 1.39   | 0.08    | 15.63      | 7.70E-05 | 15.88    | 6.74E-05 | 1.00 | LILRA4    |
| rs10955879 | 8   | 119440018 | G   | 0.67    | 0.71   | C   | 0.33    | 1.40   | 0.09    | 15.62      | 7.73E-05 | 15.70    | 7.42E-05 | 0.96 | SAMD12    |
| rs10112933 | 8   | 108859944 | G   | 0.92    | 0.56   | A   | 0.08    | 1.80   | 0.15    | 15.62      | 7.75E-05 | 15.55    | 8.02E-05 | 0.98 |           |
| rs11773916 | 8   | 119440931 | C   | 0.67    | 0.71   | T   | 0.33    | 1.40   | 0.09    | 15.61      | 7.78E-05 | 15.69    | 7.47E-05 | 0.96 | SAMD12    |
| rs12590361 | 14  | 103202717 | C   | 0.92    | 1.86   | T   | 0.08    | 0.54   | 0.16    | 15.61      | 7.80E-05 | 17.01    | 3.73E-05 | 1.00 |           |
| rs12156430 | 8   | 119442897 | C   | 0.67    | 0.71   | A   | 0.33    | 1.40   | 0.09    | 15.59      | 7.85E-05 | 15.67    | 7.54E-05 | 0.96 | SAMD12    |
| rs2072569  | 2   | 40783227  | A   | 0.90    | 0.57   | T   | 0.10    | 1.76   | 0.14    | 15.59      | 7.86E-05 | 15.54    | 8.09E-05 | 0.82 | SLC8A1    |
| rs7167162  | 15  | 36182613  | A   | 0.80    | 0.68   | G   | 0.20    | 1.47   | 0.10    | 15.59      | 7.88E-05 | 15.56    | 7.99E-05 | 1.00 |           |
| rs4748314  | 10  | 16767367  | T   | 0.45    | 1.37   | C   | 0.55    | 0.73   | 0.08    | 15.58      | 7.90E-05 | 15.74    | 7.27E-05 | 1.00 | RSU1      |
| rs7167757  | 15  | 36182930  | A   | 0.80    | 0.68   | T   | 0.20    | 1.47   | 0.10    | 15.56      | 7.98E-05 | 15.54    | 8.09E-05 | 1.00 |           |
| rs4740532  | 9   | 12816938  | G   | 0.83    | 0.66   | C   | 0.17    | 1.51   | 0.10    | 15.56      | 7.98E-05 | 15.54    | 8.10E-05 | 0.99 | LURAP1L   |
| rs4548208  | 8   | 119443712 | G   | 0.67    | 0.71   | A   | 0.33    | 1.40   | 0.09    | 15.56      | 7.99E-05 | 15.64    | 7.67E-05 | 0.96 | SAMD12    |
| rs10480976 | 7   | 52520099  | T   | 0.70    | 1.43   | G   | 0.30    | 0.70   | 0.09    | 15.55      | 8.04E-05 | 15.96    | 6.48E-05 | 0.95 |           |
| rs923997   | 4   | 11500166  | A   | 0.66    | 0.71   | G   | 0.34    | 1.40   | 0.09    | 15.55      | 8.05E-05 | 15.63    | 7.70E-05 | 1.00 |           |
| rs7838464  | 8   | 119444368 | C   | 0.67    | 0.71   | G   | 0.33    | 1.40   | 0.09    | 15.54      | 8.06E-05 | 15.62    | 7.74E-05 | 0.96 | SAMD12    |
| rs17114029 | 1   | 56961955  | T   | 0.96    | 0.44   | C   | 0.04    | 2.26   | 0.21    | 15.54      | 8.09E-05 | 15.66    | 7.58E-05 | 0.95 | PPAP2B    |
| rs4916638  | 4   | 11496628  | A   | 0.66    | 0.71   | T   | 0.34    | 1.40   | 0.09    | 15.53      | 8.14E-05 | 15.61    | 7.79E-05 | 1.00 |           |
| rs6842997  | 4   | 11493565  | G   | 0.66    | 0.71   | C   | 0.34    | 1.40   | 0.09    | 15.51      | 8.19E-05 | 15.60    | 7.85E-05 | 1.00 |           |
| rs4631494  | 8   | 119445009 | G   | 0.67    | 0.71   | C   | 0.33    | 1.40   | 0.09    | 15.50      | 8.27E-05 | 15.57    | 7.94E-05 | 0.97 | SAMD12    |
| rs4523590  | 10  | 16748793  | C   | 0.46    | 1.38   | G   | 0.54    | 0.73   | 0.08    | 15.49      | 8.29E-05 | 15.66    | 7.59E-05 | 0.98 | RSU1      |

| Marker     | Chr | Bp hg19   | Al1 | A freq1 | Or al1 | Al2 | A freq2 | Or al2 | Std err | Wald chisq | Pvalue   | Lr chisq | Lr pval  | R sq | Gene name |
|------------|-----|-----------|-----|---------|--------|-----|---------|--------|---------|------------|----------|----------|----------|------|-----------|
| rs6785790  | 3   | 47146932  | T   | 0.52    | 1.37   | C   | 0.48    | 0.73   | 0.08    | 15.48      | 8.33E-05 | 15.69    | 7.45E-05 | 1.00 | SETD2     |
| rs7012582  | 8   | 119457524 | T   | 0.68    | 0.71   | A   | 0.32    | 1.40   | 0.09    | 15.47      | 8.38E-05 | 15.54    | 8.08E-05 | 0.98 | SAMD12    |
| rs9642841  | 8   | 119445360 | T   | 0.67    | 0.72   | C   | 0.33    | 1.40   | 0.09    | 15.47      | 8.40E-05 | 15.54    | 8.08E-05 | 0.97 | SAMD12    |
| rs4443692  | 8   | 119449083 | T   | 0.70    | 0.71   | C   | 0.30    | 1.41   | 0.09    | 15.46      | 8.43E-05 | 15.51    | 8.19E-05 | 0.99 | SAMD12    |
| rs9643130  | 8   | 119445380 | C   | 0.67    | 0.72   | T   | 0.33    | 1.40   | 0.09    | 15.45      | 8.47E-05 | 15.53    | 8.14E-05 | 0.97 | SAMD12    |
| rs10103556 | 8   | 108860895 | T   | 0.92    | 0.56   | C   | 0.08    | 1.79   | 0.15    | 15.45      | 8.49E-05 | 15.38    | 8.80E-05 | 0.97 |           |
| rs2132151  | 4   | 11487955  | G   | 0.66    | 0.71   | T   | 0.34    | 1.40   | 0.09    | 15.44      | 8.50E-05 | 15.52    | 8.15E-05 | 0.99 |           |
| rs7813395  | 8   | 119446196 | A   | 0.67    | 0.72   | G   | 0.33    | 1.40   | 0.09    | 15.44      | 8.53E-05 | 15.51    | 8.20E-05 | 0.97 | SAMD12    |
| rs6749415  | 2   | 216958402 | A   | 0.75    | 0.70   | G   | 0.25    | 1.43   | 0.09    | 15.43      | 8.56E-05 | 15.49    | 8.29E-05 | 0.99 | TMEM169   |
| rs4789807  | 17  | 80556103  | C   | 0.82    | 1.59   | T   | 0.18    | 0.63   | 0.12    | 15.42      | 8.60E-05 | 16.05    | 6.17E-05 | 0.83 | FOKK2     |
| rs2276854  | 3   | 47276968  | T   | 0.53    | 1.37   | C   | 0.47    | 0.73   | 0.08    | 15.42      | 8.60E-05 | 15.64    | 7.66E-05 | 1.00 | KIF9      |
| rs7644112  | 3   | 2921135   | C   | 0.66    | 0.72   | A   | 0.34    | 1.39   | 0.08    | 15.41      | 8.63E-05 | 15.48    | 8.35E-05 | 0.99 | CNTN4     |
| rs6442762  | 3   | 2921461   | G   | 0.66    | 0.72   | T   | 0.34    | 1.39   | 0.09    | 15.41      | 8.65E-05 | 15.47    | 8.36E-05 | 0.96 | CNTN4     |
| rs1547471  | 7   | 52517417  | G   | 0.69    | 1.41   | A   | 0.31    | 0.71   | 0.09    | 15.41      | 8.65E-05 | 15.80    | 7.03E-05 | 1.00 |           |
| rs13094438 | 3   | 47277885  | A   | 0.53    | 1.37   | G   | 0.47    | 0.73   | 0.08    | 15.41      | 8.66E-05 | 15.63    | 7.72E-05 | 1.00 | KIF9      |
| rs431551   | 16  | 84538472  | T   | 0.97    | 0.40   | G   | 0.03    | 2.50   | 0.23    | 15.40      | 8.68E-05 | 15.84    | 6.91E-05 | 0.84 | TLDC1     |
| rs17114017 | 1   | 56960360  | G   | 0.96    | 0.45   | A   | 0.04    | 2.21   | 0.20    | 15.40      | 8.69E-05 | 15.55    | 8.05E-05 | 0.98 | PPAP2B    |
| rs13255144 | 8   | 119447015 | C   | 0.67    | 0.72   | T   | 0.33    | 1.40   | 0.09    | 15.40      | 8.70E-05 | 15.47    | 8.36E-05 | 0.97 | SAMD12    |
| rs6791842  | 3   | 47279810  | C   | 0.53    | 1.37   | T   | 0.47    | 0.73   | 0.08    | 15.40      | 8.72E-05 | 15.61    | 7.77E-05 | 1.00 | KIF9      |
| rs10894626 | 11  | 132815368 | G   | 0.57    | 0.72   | A   | 0.43    | 1.39   | 0.08    | 15.39      | 8.73E-05 | 15.54    | 8.08E-05 | 0.99 | OPCML     |
| rs8026989  | 15  | 27469198  | C   | 0.89    | 0.61   | G   | 0.11    | 1.64   | 0.13    | 15.39      | 8.74E-05 | 15.36    | 8.90E-05 | 0.99 | GABRG3    |
| rs10283133 | 8   | 119447420 | G   | 0.67    | 0.72   | A   | 0.33    | 1.40   | 0.09    | 15.38      | 8.79E-05 | 15.45    | 8.46E-05 | 0.97 | SAMD12    |
| rs11130123 | 3   | 47285912  | G   | 0.53    | 1.37   | A   | 0.47    | 0.73   | 0.08    | 15.37      | 8.83E-05 | 15.59    | 7.87E-05 | 1.00 | KIF9      |
| rs2276853  | 3   | 47282303  | A   | 0.53    | 1.37   | G   | 0.47    | 0.73   | 0.08    | 15.37      | 8.85E-05 | 15.58    | 7.89E-05 | 1.00 | KIF9      |
| rs4639131  | 4   | 68095870  | C   | 0.57    | 1.38   | T   | 0.43    | 0.72   | 0.08    | 15.35      | 8.93E-05 | 15.60    | 7.82E-05 | 1.00 |           |
| rs11130124 | 3   | 47292183  | C   | 0.53    | 1.37   | T   | 0.47    | 0.73   | 0.08    | 15.35      | 8.94E-05 | 15.57    | 7.97E-05 | 0.99 | KIF9      |
| rs8141754  | 22  | 33810205  | T   | 0.62    | 1.39   | A   | 0.38    | 0.72   | 0.09    | 15.34      | 9.00E-05 | 15.61    | 7.77E-05 | 1.00 | LARGE     |
| rs4082155  | 3   | 47125385  | A   | 0.52    | 1.37   | G   | 0.48    | 0.73   | 0.08    | 15.33      | 9.03E-05 | 15.54    | 8.09E-05 | 1.00 | SETD2     |
| rs9310864  | 3   | 28450371  | C   | 0.66    | 1.39   | T   | 0.34    | 0.72   | 0.09    | 15.32      | 9.06E-05 | 15.66    | 7.59E-05 | 1.00 | ZCWPW2    |
| rs7012122  | 8   | 62330609  | T   | 0.93    | 0.55   | C   | 0.07    | 1.81   | 0.15    | 15.31      | 9.12E-05 | 15.31    | 9.13E-05 | 0.99 | CLVS1     |
| rs4078466  | 3   | 47126543  | T   | 0.52    | 1.37   | C   | 0.48    | 0.73   | 0.08    | 15.31      | 9.14E-05 | 15.51    | 8.19E-05 | 1.00 | SETD2     |
| rs8138344  | 22  | 33820256  | G   | 0.62    | 1.39   | T   | 0.38    | 0.72   | 0.08    | 15.29      | 9.20E-05 | 15.57    | 7.94E-05 | 1.00 | LARGE     |
| rs4683326  | 3   | 47292827  | A   | 0.54    | 1.38   | G   | 0.46    | 0.73   | 0.08    | 15.22      | 9.55E-05 | 15.44    | 8.52E-05 | 0.96 | KIF9      |
| rs2986575  | 1   | 183907670 | G   | 0.73    | 0.71   | A   | 0.27    | 1.41   | 0.09    | 15.22      | 9.56E-05 | 15.25    | 9.41E-05 | 0.99 | COLGALT2  |
| rs6702829  | 1   | 29766241  | T   | 0.77    | 0.70   | C   | 0.23    | 1.43   | 0.09    | 15.20      | 9.69E-05 | 15.18    | 9.75E-05 | 0.98 |           |
| rs753960   | 17  | 3831240   | C   | 0.84    | 1.60   | T   | 0.16    | 0.63   | 0.12    | 15.17      | 9.82E-05 | 15.92    | 6.60E-05 | 0.90 | ATP2A3    |

To retrieve information about SNPs and their genomic context (the nearest gene and location) we used the hg18 (NCBI 36) assembly. We performed a logistic regression under an additive model on SNP dosage levels adjusting for sex and the first four principal components, using mach2dat software. The SNPs are ranked for p-value.

**S2 Table. eQTL analysis chr 2.**

| Gene Symbol      | marker        | Rs id      | CRBL     | FCTX     | HIPP     | MEDU     | OCTX     | PUTM     | SNIG     | TCTX     | THAL     | WHMT     |
|------------------|---------------|------------|----------|----------|----------|----------|----------|----------|----------|----------|----------|----------|
| <i>LOC730100</i> | chr2:52532874 | rs12619513 | 3.60E-01 | 1.40E-01 | 2.70E-02 | 3.20E-03 | 9.90E-01 | 7.50E-01 | 8.60E-01 | 9.90E-02 | 8.50E-01 | 3.90E-01 |
| <i>LOC730100</i> | chr2:52532874 | rs12619513 | 8.20E-01 | 8.10E-01 | 9.30E-01 | 3.40E-01 | 8.50E-01 | 6.90E-02 | 3.40E-01 | 5.90E-02 | 2.30E-01 | 8.20E-01 |
| <i>LOC730100</i> | chr2:52532874 | rs12619513 | 7.00E-01 | 6.80E-02 | 1.50E-01 | 2.20E-01 | 9.60E-01 | 1.70E-01 | 8.90E-01 | 3.50E-01 | 7.90E-01 | 1.40E-01 |
| <i>LOC730100</i> | chr2:52532874 | rs12619513 | 9.00E-01 | 8.70E-01 | 5.70E-01 | 8.80E-02 | 9.30E-01 | 6.40E-01 | 8.60E-01 | 8.00E-02 | 7.80E-01 | 7.80E-01 |
| <i>LOC730100</i> | chr2:52532874 | rs12619513 | 2.80E-01 | 5.20E-01 | 7.10E-01 | 1.60E-01 | 1.00E+00 | 8.90E-02 | 5.80E-01 | 9.60E-02 | 9.30E-01 | 7.50E-01 |
| <i>LOC730100</i> | chr2:52532874 | rs12619513 | 6.30E-01 | 9.90E-01 | 5.80E-01 | 7.30E-01 | 9.60E-01 | 6.90E-01 | 9.30E-02 | 5.40E-01 | 2.20E-01 | 7.20E-01 |
| <i>LOC730100</i> | chr2:52532874 | rs12619513 | 7.40E-01 | 2.50E-01 | 9.20E-01 | 1.20E-01 | 5.30E-01 | 5.30E-01 | 1.50E-01 | 2.10E-01 | 2.90E-01 | 8.70E-01 |
| <i>LOC730100</i> | chr2:52532874 | rs12619513 | 1.50E-01 | 7.80E-01 | 3.50E-01 | 1.80E-01 | 9.20E-01 | 9.00E-01 | 5.40E-01 | 2.30E-01 | 8.20E-01 | 9.30E-01 |
| <i>LOC730100</i> | chr2:52532874 | rs12619513 | 1.00E+00 | 5.10E-01 | 8.40E-01 | 4.00E-01 | 5.30E-01 | 8.30E-01 | 1.60E-01 | 8.40E-01 | 8.30E-01 | 3.00E-01 |

Summary of the eQTL exerted by rs12619513 in 10 different assayed brain tissues. CRBL = cerebellum; FCTX = frontal cortex; HIPP = hippocampus; MEDU = medulla; OCTX = occipital cortex; PUTM = putamen; SNIG = substantia nigra; TCTX = temporal cortex; THAL = thalamus; WHMT = white matter.

**S3 Table. eQTL analysis chr 17.**

| Marker    | Chr | BP       | Risk allele | Cis effect           | Target gene    | Brain region    | p-value  |
|-----------|-----|----------|-------------|----------------------|----------------|-----------------|----------|
| rs906175  | 17  | 79173462 | T           | decreased expression | <i>RFNG</i>    | hippocampus     | 5.60E-06 |
|           |     |          |             |                      | <i>AATK</i>    | temporal cortex | 6.30E-05 |
|           |     |          |             |                      | <i>MIR1250</i> |                 |          |
| rs2725391 | 17  | 79192430 | T           | decreased expression | <i>RFNG</i>    | hippocampus     | 9.50E-05 |
|           |     |          |             |                      | <i>AATK</i>    | temporal cortex | 6.30E-05 |
|           |     |          |             |                      | <i>MIR1250</i> |                 |          |
| rs969413  | 17  | 79195814 | A           | decreased expression | <i>RFNG</i>    | hippocampus     | 8.20E-05 |
|           |     |          |             |                      | <i>AATK</i>    | temporal cortex | 9.30E-05 |
|           |     |          |             |                      | <i>MIR1250</i> |                 |          |
| rs2659030 | 17  | 79177974 | A           | decreased expression | <i>RFNG</i>    | hippocampus     | 7.70E-06 |
|           |     |          |             |                      | <i>AATK</i>    | temporal cortex | 1.50E-04 |
|           |     |          |             |                      | <i>MIR1250</i> |                 |          |
| rs2255166 | 17  | 79213562 | C           | decreased expression | <i>RFNG</i>    | hippocampus     | 6.40E-05 |
| rs9319617 | 17  | 79192446 | T           | decreased expression | <i>RFNG</i>    | hippocampus     | 7.10E-04 |
|           |     |          |             |                      | <i>AATK</i>    | temporal cortex | 2.70E-05 |
|           |     |          |             |                      | <i>MIR1250</i> |                 |          |
| rs1048775 | 17  | 79202329 | C           | decreased expression | <i>AATK</i>    | temporal cortex | 5.10E-04 |
|           |     |          |             |                      | <i>MIR1250</i> |                 |          |

Summary of the eQTL exerted by rs906175, rs2725391, rs969413, rs2659030, rs2255166, rs9319617 and rs1048775. The risk allele of each SNP exerts a significant ( $p$ -value  $< 10^{-5}$ ) or suggestive ( $p$ -value  $> 10^{-5}$ ) on cis target genes such as *RFNG*, *AATK* and *MIR1250*.

**S4 Table. List of disease associated genes (DAGs).**

| <b>Gene</b>     | <b>EntrezID</b> |
|-----------------|-----------------|
| <i>A2BP1</i>    | 54715           |
| <i>ACSBG1</i>   | 23205           |
| <i>ACTC1</i>    | 70              |
| <i>ADCK5</i>    | 203054          |
| <i>AFAP1</i>    | 60312           |
| <i>AGK</i>      | 55750           |
| <i>AK5</i>      | 26289           |
| <i>ARHGAP10</i> | 79658           |
| <i>ARHGAP15</i> | 55843           |
| <i>ARRB2</i>    | 409             |
| <i>ASGR2</i>    | 433             |
| <i>ATP1A2</i>   | 477             |
| <i>ATP2A3</i>   | 489             |
| <i>ATP2C2</i>   | 9914            |
| <i>ATRNL1</i>   | 26033           |
| <i>CEP131</i>   | 22994           |
| <i>B3GAT2</i>   | 135152          |
| <i>BCAS4</i>    | 55653           |
| <i>BCL2L14</i>  | 79370           |
| <i>BNC2</i>     | 54796           |
| <i>BOK</i>      | 666             |
| <i>BPIL2</i>    | 254240          |
| <i>C12orf40</i> | 283461          |
| <i>C15orf27</i> | 123591          |
| <i>ENTHD2</i>   | 146705          |
| <i>C17orf89</i> | 284184          |
| <i>C1orf21</i>  | 81563           |
| <i>C1orf62</i>  | 254268          |
| <i>C1QTNF7</i>  | 114905          |
| <i>C2orf56</i>  | 55471           |
| <i>C5orf20</i>  | 140947          |
| <i>C9orf126</i> | 286205          |
| <i>C9orf150</i> | 286343          |
| <i>C9orf3</i>   | 84909           |
| <i>C9orf57</i>  | 138240          |
| <i>CADPS</i>    | 8618            |
| <i>CAMTA1</i>   | 23261           |
| <i>CCDC12</i>   | 151903          |
| <i>CCDC6</i>    | 8030            |

| <b>Gene</b>    | <b>EntrezID</b> |
|----------------|-----------------|
| <i>CCDC81</i>  | 60494           |
| <i>CCDC91</i>  | 55297           |
| <i>CCNY</i>    | 219771          |
| <i>CD96</i>    | 10225           |
| <i>CDH20</i>   | 28316           |
| <i>CDKN3</i>   | 1033            |
| <i>CEBPZ</i>   | 10153           |
| <i>CENPC1</i>  | 1060            |
| <i>CHCHD6</i>  | 84303           |
| <i>CHL1</i>    | 10752           |
| <i>CIB2</i>    | 10518           |
| <i>CLASP1</i>  | 23332           |
| <i>CLCN2</i>   | 1181            |
| <i>CMC1</i>    | 152100          |
| <i>CNOT2</i>   | 4848            |
| <i>CNTN4</i>   | 152330          |
| <i>CNTN5</i>   | 53942           |
| <i>COL24A1</i> | 255631          |
| <i>COL9A1</i>  | 1297            |
| <i>CPNE3</i>   | 8895            |
| <i>CPSF1</i>   | 29894           |
| <i>CSMD1</i>   | 64478           |
| <i>DCHS2</i>   | 54798           |
| <i>DGKI</i>    | 9162            |
| <i>DHRS3</i>   | 9249            |
| <i>DLL1</i>    | 28514           |
| <i>DNAH7</i>   | 56171           |
| <i>DNAJA4</i>  | 55466           |
| <i>DOCK2</i>   | 1794            |
| <i>DSCAML1</i> | 57453           |
| <i>DUSP15</i>  | 128853          |
| <i>DYSF</i>    | 8291            |
| <i>ELK3</i>    | 2004            |
| <i>ENPP1</i>   | 5167            |
| <i>ERC2</i>    | 26059           |
| <i>EXPH5</i>   | 23086           |
| <i>FAM26D</i>  | 221301          |
| <i>FAM92B</i>  | 339145          |
| <i>FARP2</i>   | 9855            |
| <i>FBXL6</i>   | 26233           |
| <i>FBXO25</i>  | 26260           |
| <i>FGF11</i>   | 2256            |

| <b>Gene</b>     | <b>EntrezID</b> |
|-----------------|-----------------|
| <i>FGF14</i>    | 2259            |
| <i>FOXK2</i>    | 3607            |
| <i>FREM2</i>    | 341640          |
| <i>GABRG3</i>   | 2567            |
| <i>GALM</i>     | 130589          |
| <i>GATA4</i>    | 2626            |
| <i>GLT25D2</i>  | 23127           |
| <i>GLTSCR1</i>  | 29998           |
| <i>GMPR</i>     | 2766            |
| <i>GP2</i>      | 2813            |
| <i>GPC5</i>     | 2262            |
| <i>GPR172A</i>  | 79581           |
| <i>GRID1</i>    | 2894            |
| <i>GRIN2B</i>   | 2904            |
| <i>GRM6</i>     | 2916            |
| <i>GYPC</i>     | 2995            |
| <i>HEG1</i>     | 57493           |
| <i>HNF1B</i>    | 6928            |
| <i>HOMER2</i>   | 9455            |
| <i>HS6ST3</i>   | 266722          |
| <i>IDH3A</i>    | 3419            |
| <i>IGSF21</i>   | 84966           |
| <i>IL1R1</i>    | 3554            |
| <i>IL1RL1</i>   | 9173            |
| <i>INADL</i>    | 10207           |
| <i>INPP4B</i>   | 8821            |
| <i>IRF8</i>     | 3394            |
| <i>ITGA1</i>    | 3672            |
| <i>ITPR1</i>    | 3708            |
| <i>KCNK4</i>    | 50801           |
| <i>KCNMA1</i>   | 3778            |
| <i>KCNMB4</i>   | 27345           |
| <i>KIAA0090</i> | 23065           |
| <i>KIAA0247</i> | 9766            |
| <i>KIAA0746</i> | 23231           |
| <i>KIAA1026</i> | 23254           |
| <i>KIAA1486</i> | 57624           |
| <i>KIF19</i>    | 124602          |
| <i>KIF9</i>     | 64147           |
| <i>KLHL18</i>   | 23276           |
| <i>KRT20</i>    | 54474           |
| <i>KRT26</i>    | 353288          |



| <b>Gene</b>      | <b>EntrezID</b> |
|------------------|-----------------|
| <i>LARGE</i>     | 9215            |
| <i>LBR</i>       | 3930            |
| <i>LDLRAD3</i>   | 143458          |
| <i>LIFR</i>      | 3977            |
| <i>LILRA4</i>    | 23547           |
| <i>LOC388419</i> | 388419          |
| <i>LOC642502</i> | 642502          |
| <i>LOC646892</i> | 646892          |
| <i>LPAR3</i>     | 23566           |
| <i>LPP</i>       | 4026            |
| <i>LRP1</i>      | 4035            |
| <i>LRP1B</i>     | 53353           |
| <i>LYRM4</i>     | 57128           |
| <i>MAML2</i>     | 84441           |
| <i>MAP1B</i>     | 4131            |
| <i>MAPK8</i>     | 5599            |
| <i>MBD5</i>      | 55777           |
| <i>MDGA2</i>     | 161357          |
| <i>MEIS1</i>     | 4211            |
| <i>MKI67IP</i>   | 84365           |
| <i>MUSK</i>      | 4593            |
| <i>MX1</i>       | 4599            |
| <i>MYO10</i>     | 4651            |
| <i>NAP5</i>      | 344148          |
| <i>NAV1</i>      | 89796           |
| <i>NBEAL2</i>    | 23218           |
| <i>NCAM2</i>     | 4685            |
| <i>NCOA7</i>     | 135112          |
| <i>NEIL2</i>     | 252969          |
| <i>NFAM1</i>     | 150372          |
| <i>NHLH2</i>     | 4808            |
| <i>NLGN2</i>     | 57555           |
| <i>NMNAT3</i>    | 349565          |
| <i>NRXN3</i>     | 9369            |
| <i>NUDT7</i>     | 283927          |
| <i>NUP50</i>     | 10762           |
| <i>OAS2</i>      | 4939            |
| <i>OPCML</i>     | 4978            |
| <i>OR10G3</i>    | 26533           |
| <i>ORC5L</i>     | 5001            |
| <i>PADI1</i>     | 29943           |
| <i>PAX5</i>      | 5079            |

| <b>Gene</b>    | <b>EntrezID</b> |
|----------------|-----------------|
| <i>PCDH15</i>  | 65217           |
| <i>PCSK2</i>   | 5126            |
| <i>PCSK5</i>   | 5125            |
| <i>PCYT1A</i>  | 5130            |
| <i>PDE10A</i>  | 10846           |
| <i>PDE8A</i>   | 5151            |
| <i>PDRG1</i>   | 81572           |
| <i>PEBP4</i>   | 157310          |
| <i>PECR</i>    | 55825           |
| <i>PELI2</i>   | 57161           |
| <i>PGLYRP2</i> | 114770          |
| <i>PHF21B</i>  | 112885          |
| <i>PIB5PA</i>  | 27124           |
| <i>PLA2G3</i>  | 50487           |
| <i>PLCB1</i>   | 23236           |
| <i>PLCB3</i>   | 5331            |
| <i>PLOD3</i>   | 8985            |
| <i>PMFBP1</i>  | 83449           |
| <i>PNPLA5</i>  | 150379          |
| <i>PON1</i>    | 5444            |
| <i>POU5F1</i>  | 5460            |
| <i>PPA2</i>    | 27068           |
| <i>PRKD3</i>   | 23683           |
| <i>PRKG1</i>   | 5592            |
| <i>PRND</i>    | 23627           |
| <i>PSG2</i>    | 5670            |
| <i>PTGER3</i>  | 5733            |
| <i>PTHR1</i>   | 5745            |
| <i>PTPN23</i>  | 25930           |
| <i>PTPRG</i>   | 5793            |
| <i>PVRL2</i>   | 5819            |
| <i>QPCT</i>    | 25797           |
| <i>RAB28</i>   | 9364            |
| <i>RAB30</i>   | 27314           |
| <i>RAB40B</i>  | 10966           |
| <i>RASA3</i>   | 22821           |
| <i>RASD2</i>   | 23551           |
| <i>RASGRF1</i> | 5923            |
| <i>RCBTB1</i>  | 55213           |
| <i>RELN</i>    | 5649            |
| <i>REV3L</i>   | 5980            |
| <i>RFX3</i>    | 5991            |

| <b>Gene</b>      | <b>EntrezID</b> |
|------------------|-----------------|
| <i>RGS7</i>      | 6000            |
| <i>ROR2</i>      | 4920            |
| <i>RPL30</i>     | 6156            |
| <i>RPS6KA2</i>   | 6196            |
| <i>RSU1</i>      | 6251            |
| <i>RXRA</i>      | 6256            |
| <i>SAMD12</i>    | 401474          |
| <i>SCAP</i>      | 22937           |
| <i>SCGB1D4</i>   | 404552          |
| <i>SDHC</i>      | 6391            |
| <i>SETD2</i>     | 29072           |
| <i>SGCG</i>      | 6445            |
| <i>SIAH2</i>     | 6478            |
| <i>SLC19A2</i>   | 10560           |
| <i>SLC38A10</i>  | 124565          |
| <i>SLC39A10</i>  | 57181           |
| <i>SLC7A13</i>   | 157724          |
| <i>SLIT3</i>     | 6586            |
| <i>SP100</i>     | 6672            |
| <i>SPHKAP</i>    | 80309           |
| <i>SPOCK3</i>    | 50859           |
| <i>ST3GAL1</i>   | 6482            |
| <i>SULT6B1</i>   | 391365          |
| <i>SYCP2</i>     | 10388           |
| <i>SYNGR1</i>    | 9145            |
| <i>TCERG1L</i>   | 256536          |
| <i>TCF7L2</i>    | 6934            |
| <i>TCL6</i>      | 27004           |
| <i>TIFAB</i>     | 497189          |
| <i>TM9SF2</i>    | 9375            |
| <i>TMEM103</i>   | 54859           |
| <i>TMEM169</i>   | 92691           |
| <i>TMEM63C</i>   | 57156           |
| <i>TMOD1</i>     | 7111            |
| <i>TMTC3</i>     | 160418          |
| <i>TNFRSF11A</i> | 8792            |
| <i>TOMM40</i>    | 10452           |
| <i>TSPAN14</i>   | 81619           |
| <i>TTC23L</i>    | 153657          |
| <i>TTC39B</i>    | 158219          |
| <i>TTC7A</i>     | 57217           |
| <i>TLL9</i>      | 164395          |

| <b>Gene</b>      | <b>EntrezID</b> |
|------------------|-----------------|
| <i>TUBA1C</i>    | 84790           |
| <i>TUSC3</i>     | 7991            |
| <i>UBE2E1</i>    | 7324            |
| <i>UBE2G1</i>    | 7326            |
| <i>UGP2</i>      | 7360            |
| <i>ULBP1</i>     | 80329           |
| <i>VAV2</i>      | 7410            |
| <i>VCAM1</i>     | 7412            |
| <i>VN1R2</i>     | 317701          |
| <i>VN1R4</i>     | 317703          |
| <i>VPS54</i>     | 51542           |
| <i>WDR21B</i>    | 285429          |
| <i>WDR45L</i>    | 56270           |
| <i>WDR61</i>     | 80349           |
| <i>WNT3</i>      | 7473            |
| <i>XKR8</i>      | 55113           |
| <i>XRCC5</i>     | 7520            |
| <i>ZCCHC24</i>   | 219654          |
| <i>ZCWPW2</i>    | 152098          |
| <i>ZHX2</i>      | 22882           |
| <i>ZNF765</i>    | 91661           |
| <i>ZNF835</i>    | 90485           |
| <i>CLVS1</i>     | 157807          |
| <i>DOCK5</i>     | 80005           |
| <i>GLIS3</i>     | 169792          |
| <i>LOC730100</i> | 730100          |
| <i>PPAP2B</i>    | 8613            |
| <i>SLC8A1</i>    | 6546            |
| <i>TLDC1</i>     | 57707           |
| <i>TMEM184C</i>  | 55751           |
| <i>ZNF883</i>    | 169834          |

Gene list (271 from genes-based and 9 non overlapping genes from SNPs-based analysis) with HugoID and EntrezID with p-value <  $10^{-1}$ , after FDR correction with the Benjamini & Hochberg procedure.

**S5 Table. Functional annotation cluster analysis.**

| Annotation Cluster 1 |                                                 | Enrichment Score: 2.09,<br>average p-value=0.00813 |             |             |             |             |                 |
|----------------------|-------------------------------------------------|----------------------------------------------------|-------------|-------------|-------------|-------------|-----------------|
| Category             | Term                                            | Count                                              | %           | p-value     | % List      | % Genome    | Fold Enrichment |
| GOTERM_BP_ALL        | GO:0048731~system development                   | 54                                                 | 19.35483871 | 2.76E-04    | 26.60098522 | 16.50609238 | 1.611585869     |
| GOTERM_BP_ALL        | GO:0048856~anatomical structure development     | 57                                                 | 20.43010753 | 3.44E-04    | 28.07881773 | 17.90167186 | 1.568502537     |
| GOTERM_BP_ALL        | GO:0048468~cell development                     | 21                                                 | 7.52688172  | 9.41E-04    | 10.34482759 | 4.562198923 | 2.267509103     |
| GOTERM_BP_ALL        | GO:0031175~neuron projection development        | 12                                                 | 4.301075269 | 0.001162356 | 5.911330049 | 1.813544914 | 3.259544335     |
| GOTERM_BP_ALL        | GO:0048666~neuron development                   | 14                                                 | 5.017921147 | 0.00120934  | 6.896551724 | 2.401530179 | 2.871732275     |
| GOTERM_BP_ALL        | GO:0032502~developmental process                | 65                                                 | 23.29749104 | 0.001223731 | 32.01970443 | 22.30093511 | 1.435800978     |
| GOTERM_BP_ALL        | GO:0007275~multicellular organismal development | 60                                                 | 21.50537634 | 0.001513732 | 29.55665025 | 20.29611788 | 1.456271116     |
| GOTERM_BP_ALL        | GO:0030182~neuron differentiation               | 16                                                 | 5.734767025 | 0.001608319 | 7.881773399 | 3.102862001 | 2.540162404     |
| GOTERM_BP_ALL        | GO:0007399~nervous system development           | 29                                                 | 10.39426523 | 0.001738258 | 14.28571429 | 7.707565883 | 1.853466387     |
| GOTERM_BP_ALL        | GO:0030030~cell projection organization         | 14                                                 | 5.017921147 | 0.002495616 | 6.896551724 | 2.606970813 | 2.645427286     |
| GOTERM_BP_ALL        | GO:0007155~cell adhesion                        | 21                                                 | 7.52688172  | 0.002529166 | 10.34482759 | 4.958911873 | 2.086108374     |
| GOTERM_BP_ALL        | GO:0022610~biological adhesion                  | 21                                                 | 7.52688172  | 0.002570961 | 10.34482759 | 4.965996033 | 2.083132471     |
| GOTERM_BP_ALL        | GO:0048699~generation of neurons                | 18                                                 | 6.451612903 | 0.00281753  | 8.866995074 | 3.960045339 | 2.239114534     |
| GOTERM_BP_ALL        | GO:0030154~cell differentiation                 | 38                                                 | 13.62007168 | 0.003150974 | 18.71921182 | 11.59676962 | 1.614174674     |
| GOTERM_BP_ALL        | GO:0048869~cellular developmental process       | 39                                                 | 13.97849462 | 0.003540702 | 19.21182266 | 12.08557665 | 1.58964882      |
| GOTERM_BP_ALL        | GO:0048812~neuron projection morphogenesis      | 10                                                 | 3.584229391 | 0.00360067  | 4.926108374 | 1.508926041 | 3.264645343     |
| GOTERM_CC_ALL        | GO:0043005~neuron projection                    | 13                                                 | 4.659498208 | 0.004666945 | 5.555555556 | 2.149861705 | 2.584145549     |
| GOTERM_BP_ALL        | GO:0032989~cellular component morphogenesis     | 14                                                 | 5.017921147 | 0.004757993 | 6.896551724 | 2.812411448 | 2.452184487     |
| GOTERM_BP_ALL        | GO:0022008~neurogenesis                         | 18                                                 | 6.451612903 | 0.005808487 | 8.866995074 | 4.257580051 | 2.082637312     |
| GOTERM_BP_ALL        | GO:0016337~cell-cell adhesion                   | 11                                                 | 3.94265233  | 0.006476697 | 5.418719212 | 1.95522811  | 2.771400014     |
| GOTERM_BP_ALL        | GO:0009653~anatomical structure morphogenesis   | 29                                                 | 10.39426523 | 0.006605968 | 14.28571429 | 8.479739303 | 1.68468791      |
| GOTERM_BP_ALL        | GO:0048858~cell projection morphogenesis        | 10                                                 | 3.584229391 | 0.008798637 | 4.926108374 | 1.735619156 | 2.838242686     |
| GOTERM_BP_ALL        | GO:0032990~cell part morphogenesis              | 10                                                 | 3.584229391 | 0.011512067 | 4.926108374 | 1.813544914 | 2.716286946     |
| GOTERM_BP_ALL        | GO:0000902~cell morphogenesis                   | 12                                                 | 4.301075269 | 0.013591973 | 5.911330049 | 2.521960895 | 2.343941994     |
| GOTERM_BP_ALL        | GO:0048513~organ development                    | 37                                                 | 13.26164875 | 0.013917191 | 18.22660099 | 12.31226976 | 1.480360757     |
| GOTERM_CC_ALL        | GO:0042995~cell projection                      | 19                                                 | 6.810035842 | 0.014306661 | 8.11965812  | 4.381443299 | 1.853192559     |

|               |                                                                        |    |             |             |             |             |             |
|---------------|------------------------------------------------------------------------|----|-------------|-------------|-------------|-------------|-------------|
| GOTERM_BP_ALL | GO:0007409~axonogenesis                                                | 8  | 2.867383513 | 0.021142241 | 3.9408867   | 1.367242845 | 2.882360448 |
| GOTERM_BP_ALL | GO:0032501~multicellular<br>organismal process                         | 76 | 27.24014337 | 0.02188572  | 37.43842365 | 30.32020402 | 1.234768197 |
| GOTERM_BP_ALL | GO:0048667~cell<br>morphogenesis involved in<br>neuron differentiation | 8  | 2.867383513 | 0.030965423 | 3.9408867   | 1.480589402 | 2.661701275 |
| GOTERM_BP_ALL | GO:0007156~homophilic<br>cell adhesion                                 | 6  | 2.150537634 | 0.040068815 | 2.955665025 | 0.928024936 | 3.184898282 |
| GOTERM_BP_ALL | GO:0006928~cell motion<br>GO:0000904~cell                              | 13 | 4.659498208 | 0.04069385  | 6.403940887 | 3.364975914 | 1.903116412 |
| GOTERM_BP_ALL | morphogenesis involved in<br>differentiation                           | 8  | 2.867383513 | 0.061957633 | 3.9408867   | 1.728534996 | 2.279899863 |
| GOTERM_BP_ALL | GO:0007411~axon guidance                                               | 4  | 1.433691756 | 0.19768168  | 1.97044335  | 0.758005101 | 2.599511993 |
| GOTERM_CC_ALL | GO:0030424~axon                                                        | 5  | 1.792114695 | 0.204747025 | 2.136752137 | 0.999497108 | 2.137827232 |
| GOTERM_BP_ALL | GO:0016043~cellular<br>component organization                          | 41 | 14.6953405  | 0.239786845 | 20.19704433 | 17.69623123 | 1.141318967 |
| GOTERM_BP_ALL | GO:0007417~central<br>nervous system<br>development                    | 9  | 3.225806452 | 0.264031432 | 4.433497537 | 3.010767923 | 1.472547088 |
| GOTERM_BP_ALL | GO:0007420~brain<br>development                                        | 5  | 1.792114695 | 0.596308971 | 2.463054187 | 2.047322188 | 1.203061346 |

---

**Annotation Cluster 2**      **Enrichment Score: 1.83,**  
**average p-value=0.01479**

---

| Category      | Term                                | Count | %           | PValue      | % List      | % Genome    | Fold Enrichment |
|---------------|-------------------------------------|-------|-------------|-------------|-------------|-------------|-----------------|
| GOTERM_CC_ALL | GO:0016020~membrane                 | 132   | 47.31182796 | 7.28E-04    | 56.41025641 | 45.67513201 | 1.235032148     |
| GOTERM_CC_ALL | GO:0044459~plasma<br>membrane part  | 47    | 16.84587814 | 0.007600139 | 20.08547009 | 13.84837817 | 1.450384286     |
| GOTERM_CC_ALL | GO:0044425~membrane<br>part         | 116   | 41.57706093 | 0.007784709 | 49.57264957 | 41.35026402 | 1.198847232     |
| GOTERM_CC_ALL | GO:0031224~intrinsic to<br>membrane | 98    | 35.12544803 | 0.013203113 | 41.88034188 | 34.47950717 | 1.214644446     |
| GOTERM_CC_ALL | GO:0005886~plasma<br>membrane       | 70    | 25.08960573 | 0.022358928 | 29.91452991 | 23.74277093 | 1.259942658     |
| GOTERM_CC_ALL | GO:0016021~integral to<br>membrane  | 89    | 31.89964158 | 0.083430466 | 38.03418803 | 33.29771184 | 1.142246296     |
| GOTERM_MF_ALL | GO:0004872~receptor<br>activity     | 35    | 12.54480287 | 0.134643794 | 15.0862069  | 12.13762134 | 1.24292944      |

---

**Annotation Cluster 3**      **Enrichment Score: 1.69,**  
**average p-value=0.02042**

---

| Category      | Term                                              | Count | %           | PValue      | % List      | % Genome    | Fold Enrichment |
|---------------|---------------------------------------------------|-------|-------------|-------------|-------------|-------------|-----------------|
| GOTERM_CC_ALL | GO:0045202~synapse                                | 14    | 5.017921147 | 0.002275887 | 5.982905983 | 2.231581594 | 2.681016011     |
| GOTERM_CC_ALL | GO:0043005~neuron<br>projection                   | 13    | 4.659498208 | 0.004666945 | 5.555555556 | 2.149861705 | 2.584145549     |
| GOTERM_CC_ALL | GO:0044456~synapse part                           | 10    | 3.584229391 | 0.010507684 | 4.273504274 | 1.546391753 | 2.763532764     |
| GOTERM_BP_ALL | GO:0048167~regulation of<br>synaptic plasticity   | 5     | 1.792114695 | 0.013258561 | 2.463054187 | 0.453386228 | 5.432573892     |
| GOTERM_BP_ALL | GO:0050804~regulation of<br>synaptic transmission | 7     | 2.508960573 | 0.013502861 | 3.448275862 | 0.963445735 | 3.579107505     |
| GOTERM_BP_ALL | GO:0051969~regulation of<br>transmission of nerve | 7     | 2.508960573 | 0.019115802 | 3.448275862 | 1.041371493 | 3.311283134     |

| impulse       |                                                           |    |             |             |             |             |             |
|---------------|-----------------------------------------------------------|----|-------------|-------------|-------------|-------------|-------------|
| GOTERM_BP_ALL | GO:0031644~regulation of neurological system process      | 7  | 2.508960573 | 0.022766028 | 3.448275862 | 1.083876452 | 3.181428893 |
| GOTERM_BP_ALL | GO:0044057~regulation of system process                   | 10 | 3.584229391 | 0.03389372  | 4.926108374 | 2.189005384 | 2.250386596 |
| GOTERM_BP_ALL | GO:0010646~regulation of cell communication               | 21 | 7.52688172  | 0.10669323  | 10.34482759 | 7.353357892 | 1.406816823 |
| GOTERM_BP_ALL | GO:0051239~regulation of multicellular organismal process | 16 | 5.734767025 | 0.364412907 | 7.881773399 | 6.63785775  | 1.187397154 |

DAVID Functional annotation clusters with enrichment score (ES) > 1.3 (ES =  $-\log_{10}$  (geometric mean (p-values))). Legend: Count = Number of the disease associated genes (DAGs) in the GO term. % = Percent of DAGs in the GO term; Pvalue = p-value of a modified Fischer's exact test of the overrepresentation analysis; %List = percent of DAGs in the GO term considered by DAVID; %Genome = Percent of genes in the GO term from DAVID genome; Fold Enrichment =  $\frac{\%List}{\%Genome}$ ; Fisher's test evaluate the question if genes in %List is more than random chance comparing to the genes in the %genome, i.e.  $H_0: \%List = \%Genome$ , or Fold Enrichment = 1; Genes = EntrezID of the DAGs in the GO term.

**S6 Table. Brain-specific functional annotation clusters.**

| Annotation Cluster 1 |                                                                  | Enrichment Score: 2.09, average p-value=0.00813 |                                                                                                                                                                                                                  |  |
|----------------------|------------------------------------------------------------------|-------------------------------------------------|------------------------------------------------------------------------------------------------------------------------------------------------------------------------------------------------------------------|--|
| Category             | Term                                                             | Count                                           | Gene ID                                                                                                                                                                                                          |  |
| GOTERM_BP_ALL        | GO:0031175~neuron projection development                         | 12                                              | <i>CNTN4, DSCAML1, ITGA1, LIFR, MAP1B, NCAM2, NRXN3, PRKG1, RASGRF1, RELN, RXRA, SLIT3</i>                                                                                                                       |  |
| GOTERM_BP_ALL        | GO:0048666~neuron development                                    | 14                                              | <i>CNTN4, DSCAML1, FARP2, ITGA1, LIFR, MAP1B, NCAM2, NRXN3, OPCML, PRKG1, RASGRF1, RELN, RXRA, SLIT3</i>                                                                                                         |  |
| GOTERM_BP_ALL        | GO:0030182~neuron differentiation                                | 16                                              | <i>CNTN4, DSCAML1, FARP2, ITGA1, KCNMA1, LIFR, MAP1B, MDGA2, NCAM2, NRXN3, OPCML, PRKG1, RASGRF1, RELN, RXRA, SLIT3</i>                                                                                          |  |
| GOTERM_BP_ALL        | GO:0007399~nervous system development                            | 29                                              | <i>ACSBG1, CHL1, CNTN4, DLL1, DSCAML1, FARP2, FGF11, FGF14, HNF1B, ITGA1, KCNMA1, LIFR, MAP1B, MDGA2, NAV1, NCAM2, NHLH2, NLGN2, NRXN3, OPCML, PAX5, PCSK2, PRKG1, RASGRF1, RELN, RXRA, SLIT3, TCF7L2, XRCC5</i> |  |
| GOTERM_BP_ALL        | GO:0048699~generation of neurons                                 | 18                                              | <i>CNTN4, DLL1, DSCAML1, FARP2, ITGA1, KCNMA1, LIFR, MAP1B, MDGA2, NCAM2, NRXN3, OPCML, PRKG1, RASGRF1, RELN, RXRA, SLIT3, XRCC5</i>                                                                             |  |
| GOTERM_BP_ALL        | GO:0048812~neuron projection morphogenesis                       | 10                                              | <i>CNTN4, DSCAML1, ITGA1, LIFR, MAP1B, NCAM2, NRXN3, RELN, RXRA, SLIT3</i>                                                                                                                                       |  |
| GOTERM_CC_ALL        | GO:0043005~neuron projection                                     | 13                                              | <i>ATP1A2, CLCN2, CNTN4, ERC2, GRIN2B, ITGA1, KCNMA1, LRP1, MAP1B, NCAM2, RASGRF1, RELN, RXRA</i>                                                                                                                |  |
| GOTERM_BP_ALL        | GO:0022008~neurogenesis                                          | 18                                              | <i>CNTN4, DLL1, DSCAML1, FARP2, ITGA1, KCNMA1, LIFR, MAP1B, MDGA2, NCAM2, NRXN3, OPCML, PRKG1, RASGRF1, RELN, RXRA, SLIT3, XRCC5</i>                                                                             |  |
| GOTERM_BP_ALL        | GO:0007409~axonogenesis                                          | 8                                               | <i>CNTN4, DSCAML1, MAP1B, NCAM2, NRXN3, RELN, RXRA, SLIT3</i>                                                                                                                                                    |  |
| GOTERM_BP_ALL        | GO:0048667~cell morphogenesis involved in neuron differentiation | 8                                               | <i>CNTN4, DSCAML1, MAP1B, NCAM2, NRXN3, RELN, RXRA, SLIT3</i>                                                                                                                                                    |  |
| GOTERM_BP_ALL        | GO:0007411~axon guidance                                         | 4                                               | <i>CNTN4, NRXN3, RELN, SLIT3</i>                                                                                                                                                                                 |  |
| GOTERM_CC_ALL        | GO:0030424~axon                                                  | 5                                               | <i>CNTN4, KCNMA1, MAP1B, NCAM2, RXRA</i>                                                                                                                                                                         |  |
| GOTERM_BP_ALL        | GO:0007417~central nervous system development                    | 9                                               | <i>CNTN4, DSCAML1, HNF1B, MAP1B, MDGA2, NHLH2, PRKG1, RELN, SLIT3</i>                                                                                                                                            |  |
| GOTERM_BP_ALL        | GO:0007420~brain development                                     | 5                                               | <i>CNTN4, DSCAML1, HNF1B, PRKG1, RELN</i>                                                                                                                                                                        |  |

  

| Annotation Cluster 3 |                                                        | Enrichment Score: 1.69, average p-value=0.02042 |                                                                                                              |  |
|----------------------|--------------------------------------------------------|-------------------------------------------------|--------------------------------------------------------------------------------------------------------------|--|
| Category             | Term                                                   | Count                                           | Gene ID                                                                                                      |  |
| GOTERM_CC_ALL        | GO:0045202~synapse                                     | 14                                              | <i>ATP1A2, CADPS, ERC2, GABRG3, GRID1, GRIN2B, HOMER2, ITPR1, KCNMA1, MAP1B, MUSK, NLGN2, PCDH15, SYNGR1</i> |  |
| GOTERM_CC_ALL        | GO:0043005~neuron projection                           | 13                                              | <i>ATP1A2, CLCN2, CNTN4, ERC2, GRIN2B, ITGA1, KCNMA1, LRP1, MAP1B, NCAM2, RASGRF1, RELN, RXRA</i>            |  |
| GOTERM_CC_ALL        | GO:0044456~synapse part                                | 10                                              | <i>ERC2, GABRG3, GRID1, GRIN2B, HOMER2, ITPR1, KCNMA1, MAP1B, NLGN2, SYNGR1</i>                              |  |
| GOTERM_BP_ALL        | GO:0048167~regulation of synaptic plasticity           | 5                                               | <i>CNTN4, GRIN2B, MAP1B, RASGRF1, SYNGR1</i>                                                                 |  |
| GOTERM_BP_ALL        | GO:0050804~regulation of synaptic transmission         | 7                                               | <i>CNTN4, GRIN2B, KCNMB4, MAP1B, NLGN2, RASGRF1, SYNGR1</i>                                                  |  |
| GOTERM_BP_ALL        | GO:0051969~regulation of transmission of nerve impulse | 7                                               | <i>CNTN4, GRIN2B, KCNMB4, MAP1B, NLGN2, RASGRF1, SYNGR1</i>                                                  |  |
| GOTERM_BP_ALL        | GO:0031644~regulation of neurological system process   | 7                                               | <i>CNTN4, GRIN2B, KCNMB4, MAP1B, NLGN2, RASGRF1, SYNGR1</i>                                                  |  |

The genes supporting brain-specific GO terms of the functional annotation clustering are listed.



**S7 Table. TopGO terms analysis.**

| Ontology | GO ID      | Term                                                                                                      | Annotated | Significant | Expected | p-value  |
|----------|------------|-----------------------------------------------------------------------------------------------------------|-----------|-------------|----------|----------|
|          | GO:0007268 | synaptic transmission                                                                                     | 621       | 23          | 10.58    | 4.30E-05 |
|          | GO:0070588 | calcium ion transmembrane transport                                                                       | 139       | 6           | 2.37     | 5.50E-05 |
|          | GO:0071872 | cellular response to epinephrine stimulus                                                                 | 8         | 0           | 0.14     | 6.20E-05 |
|          | GO:0007417 | central nervous system development                                                                        | 674       | 14          | 11.48    | 9.90E-05 |
|          | GO:0006898 | receptor-mediated endocytosis                                                                             | 171       | 6           | 2.91     | 0.00012  |
|          | GO:0035249 | synaptic transmission, glutamatergic                                                                      | 69        | 5           | 1.18     | 0.00013  |
|          | GO:0034765 | regulation of ion transmembrane transport                                                                 | 268       | 7           | 4.56     | 0.00017  |
|          | GO:0048813 | dendrite morphogenesis                                                                                    | 72        | 1           | 1.23     | 0.00018  |
|          | GO:0048148 | behavioral response to cocaine                                                                            | 11        | 1           | 0.19     | 0.00019  |
|          | GO:0002040 | sprouting angiogenesis                                                                                    | 48        | 0           | 0.82     | 0.00044  |
|          | GO:0006112 | energy reserve metabolic process                                                                          | 147       | 4           | 2.5      | 0.00049  |
|          | GO:0016525 | negative regulation of angiogenesis                                                                       | 53        | 0           | 0.9      | 0.00058  |
|          | GO:0001657 | ureteric bud development                                                                                  | 80        | 1           | 1.36     | 0.00063  |
|          | GO:0086091 | regulation of heart rate by cardiac cond...                                                               | 19        | 0           | 0.32     | 0.00067  |
|          | GO:0051966 | regulation of synaptic transmission, glutamatergic                                                        | 41        | 3           | 0.7      | 0.00089  |
|          | GO:0051968 | positive regulation of synaptic transmission, glutamatergic                                               | 16        | 2           | 0.27     | 0.001    |
|          | GO:0090288 | negative regulation of cellular response to growth factor stimulus                                        | 88        | 1           | 1.5      | 0.00108  |
|          | GO:2000311 | regulation of alpha-amino-3-hydroxy-5-methyl-4-isoxazole propionate selective glutamate receptor activity | 18        | 2           | 0.31     | 0.00109  |
| BP       | GO:0021756 | striatum development                                                                                      | 14        | 0           | 0.24     | 0.0011   |
|          | GO:0071805 | potassium ion transmembrane transport                                                                     | 134       | 4           | 2.28     | 0.00111  |
|          | GO:0007205 | protein kinase C-activating G-protein coupled receptor signaling pathway                                  | 32        | 4           | 0.55     | 0.00117  |
|          | GO:2000310 | regulation of N-methyl-D-aspartate selective glutamate receptor activity                                  | 13        | 2           | 0.22     | 0.00144  |
|          | GO:0060402 | calcium ion transport into cytosol                                                                        | 90        | 1           | 1.53     | 0.0016   |
|          | GO:0030282 | bone mineralization                                                                                       | 82        | 3           | 1.4      | 0.00185  |
|          | GO:0086064 | cell communication by electrical coupling involved in cardiac conduction                                  | 17        | 1           | 0.29     | 0.00193  |
|          | GO:0006605 | protein targeting                                                                                         | 416       | 5           | 7.09     | 0.00201  |
|          | GO:0016477 | cell migration                                                                                            | 852       | 17          | 14.51    | 0.00209  |
|          | GO:1901381 | positive regulation of potassium ion transmembrane transport                                              | 10        | 0           | 0.17     | 0.00211  |
|          | GO:0086013 | membrane repolarization during cardiac muscle cell action potential                                       | 8         | 0           | 0.14     | 0.0023   |
|          | GO:0032092 | positive regulation of protein binding                                                                    | 47        | 1           | 0.8      | 0.00235  |
|          | GO:0051480 | cytosolic calcium ion homeostasis                                                                         | 192       | 3           | 3.27     | 0.00252  |
|          | GO:0060612 | adipose tissue development                                                                                | 26        | 0           | 0.44     | 0.00276  |
|          | GO:0007411 | axon guidance                                                                                             | 319       | 13          | 5.43     | 0.00284  |
|          | GO:0050974 | detection of mechanical stimulus involved in sensory perception                                           | 20        | 1           | 0.34     | 0.00306  |
|          | GO:0060291 | long-term synaptic potentiation                                                                           | 27        | 1           | 0.46     | 0.00308  |
|          | GO:0052695 | cellular glucuronidation                                                                                  | 16        | 1           | 0.27     | 0.00313  |

|            |                                                                              |     |    |      |         |
|------------|------------------------------------------------------------------------------|-----|----|------|---------|
| GO:0005977 | glycogen metabolic process                                                   | 62  | 3  | 1.06 | 0.00313 |
| GO:0050919 | negative chemotaxis                                                          | 17  | 1  | 0.29 | 0.00315 |
| GO:0050796 | regulation of insulin secretion                                              | 139 | 3  | 2.37 | 0.00319 |
| GO:0030032 | lamellipodium assembly                                                       | 43  | 1  | 0.73 | 0.0033  |
| GO:0007612 | learning                                                                     | 97  | 4  | 1.65 | 0.0033  |
| GO:0032321 | positive regulation of Rho GTPase activity                                   | 120 | 6  | 2.04 | 0.00335 |
| GO:0014068 | positive regulation of phosphatidylinositol 3-kinase signaling               | 44  | 1  | 0.75 | 0.00341 |
| GO:0010765 | positive regulation of sodium ion transport                                  | 19  | 1  | 0.32 | 0.00367 |
| GO:0021879 | forebrain neuron differentiation                                             | 40  | 0  | 0.68 | 0.00369 |
| GO:0007613 | memory                                                                       | 77  | 5  | 1.31 | 0.00377 |
| GO:0038084 | vascular endothelial growth factor signaling pathway                         | 19  | 0  | 0.32 | 0.00384 |
| GO:0086014 | atrial cardiac muscle cell action potential                                  | 8   | 0  | 0.14 | 0.00405 |
| GO:0035235 | ionotropic glutamate receptor signaling pathway                              | 22  | 2  | 0.37 | 0.00431 |
| GO:0060071 | Wnt signaling pathway, planar cell polarity pathway                          | 25  | 1  | 0.43 | 0.00436 |
| GO:0007202 | activation of phospholipase C activity                                       | 52  | 1  | 0.89 | 0.00483 |
| GO:0001993 | regulation of systemic arterial blood pressure by norepinephrine-epinephrine | 8   | 0  | 0.14 | 0.00484 |
| GO:0043647 | inositol phosphate metabolic process                                         | 48  | 3  | 0.82 | 0.00486 |
| GO:0030048 | actin filament-based movement                                                | 89  | 4  | 1.52 | 0.00495 |
| GO:0060055 | angiogenesis involved in wound healing                                       | 12  | 0  | 0.2  | 0.00496 |
| GO:0003007 | heart morphogenesis                                                          | 184 | 7  | 3.13 | 0.00496 |
| GO:0043271 | negative regulation of ion transport                                         | 61  | 0  | 1.04 | 0.00503 |
| GO:0021854 | hypothalamus development                                                     | 17  | 0  | 0.29 | 0.00584 |
| GO:0060337 | type I interferon signaling pathway                                          | 64  | 4  | 1.09 | 0.0059  |
| GO:0030101 | natural killer cell activation                                               | 60  | 2  | 1.02 | 0.00612 |
| GO:0046548 | retinal rod cell development                                                 | 8   | 0  | 0.14 | 0.0062  |
| GO:0046470 | phosphatidylcholine metabolic process                                        | 54  | 3  | 0.92 | 0.00621 |
| GO:0000186 | activation of MAPKK activity                                                 | 54  | 0  | 0.92 | 0.00635 |
| GO:0006883 | cellular sodium ion homeostasis                                              | 11  | 1  | 0.19 | 0.00661 |
| GO:0007512 | adult heart development                                                      | 15  | 0  | 0.26 | 0.00661 |
| GO:0007626 | locomotory behavior                                                          | 164 | 8  | 2.79 | 0.00698 |
| GO:0045454 | cell redox homeostasis                                                       | 44  | 1  | 0.75 | 0.00758 |
| GO:0072215 | regulation of metanephros development                                        | 18  | 1  | 0.31 | 0.0077  |
| GO:0010822 | positive regulation of mitochondrion organization                            | 51  | 2  | 0.87 | 0.00779 |
| GO:0007216 | G-protein coupled glutamate receptor signaling pathway                       | 13  | 2  | 0.22 | 0.00781 |
| GO:0006814 | sodium ion transport                                                         | 154 | 3  | 2.62 | 0.00786 |
| GO:0060122 | inner ear receptor stereocilium organization                                 | 17  | 0  | 0.29 | 0.0079  |
| GO:0001523 | retinoid metabolic process                                                   | 65  | 3  | 1.11 | 0.00818 |
| GO:0048843 | negative regulation of axon extension involved in axon guidance              | 8   | 1  | 0.14 | 0.00825 |
| GO:0050732 | negative regulation of peptidyl-tyrosine phosphorylation                     | 27  | 0  | 0.46 | 0.0083  |
| GO:2000649 | regulation of sodium ion transmembrane transporter activity                  | 23  | 0  | 0.39 | 0.00832 |
| GO:0001568 | blood vessel development                                                     | 460 | 10 | 7.83 | 0.00863 |

|    |            |                                                                                |      |     |        |          |
|----|------------|--------------------------------------------------------------------------------|------|-----|--------|----------|
|    | GO:0090316 | positive regulation of intracellular protein transport                         | 98   | 2   | 1.67   | 0.00874  |
|    | GO:0090330 | regulation of platelet aggregation                                             | 11   | 1   | 0.19   | 0.00922  |
|    | GO:0060251 | regulation of glial cell proliferation                                         | 12   | 0   | 0.2    | 0.00927  |
|    | GO:1902547 | regulation of cellular response to vascular endothelial growth factor stimulus | 8    | 0   | 0.14   | 0.00935  |
|    | GO:0030730 | sequestering of triglyceride                                                   | 12   | 1   | 0.2    | 0.00952  |
|    | GO:0050890 | cognition                                                                      | 192  | 9   | 3.27   | 0.00972  |
|    | GO:0007158 | neuron cell-cell adhesion                                                      | 12   | 4   | 0.2    | 0.00975  |
|    | GO:0034205 | beta-amyloid formation                                                         | 9    | 0   | 0.15   | 0.00976  |
|    | GO:0035556 | intracellular signal transduction                                              | 1902 | 40  | 32.39  | 0.00988  |
|    | GO:0055003 | cardiac myofibril assembly                                                     | 14   | 1   | 0.24   | 0.00998  |
|    | GO:0030054 | cell junction                                                                  | 883  | 21  | 15.08  | 6.40E-06 |
|    | GO:0045211 | postsynaptic membrane                                                          | 158  | 7   | 2.7    | 7.10E-06 |
|    | GO:0005581 | collagen trimer                                                                | 76   | 3   | 1.3    | 7.20E-05 |
|    | GO:0042734 | presynaptic membrane                                                           | 50   | 3   | 0.85   | 0.00011  |
|    | GO:0016324 | apical plasma membrane                                                         | 210  | 3   | 3.59   | 0.00022  |
|    | GO:0014069 | postsynaptic density                                                           | 107  | 4   | 1.83   | 0.00026  |
|    | GO:0045202 | synapse                                                                        | 459  | 16  | 7.84   | 0.00035  |
|    | GO:0030425 | dendrite                                                                       | 291  | 12  | 4.97   | 0.00035  |
|    | GO:0008328 | ionotropic glutamate receptor complex                                          | 42   | 2   | 0.72   | 0.00096  |
|    | GO:0048786 | presynaptic active zone                                                        | 22   | 1   | 0.38   | 0.00174  |
|    | GO:0030027 | lamellipodium                                                                  | 127  | 2   | 2.17   | 0.00197  |
|    | GO:0005891 | voltage-gated calcium channel complex                                          | 34   | 0   | 0.58   | 0.00253  |
|    | GO:0030666 | endocytic vesicle membrane                                                     | 97   | 2   | 1.66   | 0.00287  |
|    | GO:0043025 | neuronal cell body                                                             | 263  | 5   | 4.49   | 0.00339  |
| CC | GO:0005887 | integral component of plasma membrane                                          | 1075 | 25  | 18.36  | 0.0038   |
|    | GO:0030424 | axon                                                                           | 245  | 3   | 4.18   | 0.00389  |
|    | GO:0032154 | cleavage furrow                                                                | 37   | 0   | 0.63   | 0.00411  |
|    | GO:0043235 | receptor complex                                                               | 242  | 6   | 4.13   | 0.00446  |
|    | GO:0005737 | cytoplasm                                                                      | 7567 | 133 | 129.22 | 0.00525  |
|    | GO:0000159 | protein phosphatase type 2A complex                                            | 18   | 0   | 0.31   | 0.00625  |
|    | GO:0008076 | voltage-gated potassium channel complex                                        | 63   | 2   | 1.08   | 0.0065   |
|    | GO:0043197 | dendritic spine                                                                | 77   | 3   | 1.31   | 0.00687  |
|    | GO:0005884 | actin filament                                                                 | 49   | 1   | 0.84   | 0.00711  |
|    | GO:0012507 | ER to Golgi transport vesicle membrane                                         | 31   | 1   | 0.53   | 0.00711  |
|    | GO:0014701 | junctional sarcoplasmic reticulum membra...                                    | 9    | 0   | 0.15   | 0.00728  |
|    | GO:0048471 | perinuclear region of cytoplasm                                                | 447  | 6   | 7.63   | 0.00771  |
|    | GO:0042613 | MHC class II protein complex                                                   | 10   | 0   | 0.17   | 0.0082   |
|    | GO:0001725 | stress fiber                                                                   | 43   | 0   | 0.73   | 0.00936  |
|    | GO:0005516 | calmodulin binding                                                             | 150  | 3   | 2.54   | 0.00023  |
| MF | GO:0005001 | transmembrane receptor protein tyrosine phosphatase activity                   | 18   | 1   | 0.31   | 0.0003   |

|            |                                                                                   |      |    |       |         |
|------------|-----------------------------------------------------------------------------------|------|----|-------|---------|
| GO:0017124 | SH3 domain binding                                                                | 96   | 1  | 1.63  | 0.00033 |
| GO:0008013 | beta-catenin binding                                                              | 53   | 1  | 0.9   | 0.00048 |
| GO:0044325 | ion channel binding                                                               | 70   | 0  | 1.19  | 0.00052 |
| GO:0004970 | ionotropic glutamate receptor activity                                            | 17   | 2  | 0.29  | 0.00073 |
| GO:0016641 | oxidoreductase activity, acting on the CH-NH2 group of donors, oxygen as acceptor | 10   | 1  | 0.17  | 0.00076 |
| GO:0030165 | PDZ domain binding                                                                | 87   | 1  | 1.48  | 0.00098 |
| GO:0035254 | glutamate receptor binding                                                        | 22   | 2  | 0.37  | 0.00104 |
| GO:0008331 | high voltage-gated calcium channel activity                                       | 9    | 0  | 0.15  | 0.00125 |
| GO:0008270 | zinc ion binding                                                                  | 947  | 13 | 16.06 | 0.00165 |
| GO:0015020 | glucuronosyltransferase activity                                                  | 26   | 1  | 0.44  | 0.00176 |
| GO:0016500 | protein-hormone receptor activity                                                 | 8    | 0  | 0.14  | 0.00202 |
| GO:0005102 | receptor binding                                                                  | 1072 | 25 | 18.18 | 0.00223 |
| GO:0004871 | signal transducer activity                                                        | 1306 | 27 | 22.15 | 0.00223 |
| GO:0070016 | armadillo repeat domain binding                                                   | 9    | 1  | 0.15  | 0.00285 |
| GO:0004714 | transmembrane receptor protein tyrosine ...                                       | 62   | 2  | 1.05  | 0.00301 |
| GO:0001965 | G-protein alpha-subunit binding                                                   | 14   | 1  | 0.24  | 0.00349 |
| GO:0030506 | ankyrin binding                                                                   | 20   | 0  | 0.34  | 0.00357 |
| GO:0005234 | extracellular-glutamate-gated ion channel                                         | 17   | 2  | 0.29  | 0.00412 |
| GO:0004896 | cytokine receptor activity                                                        | 61   | 3  | 1.03  | 0.00437 |
| GO:0005249 | voltage-gated potassium channel activity                                          | 78   | 1  | 1.32  | 0.00469 |
| GO:0005524 | ATP binding                                                                       | 1202 | 25 | 20.38 | 0.00497 |
| GO:0005044 | scavenger receptor activity                                                       | 34   | 1  | 0.58  | 0.00533 |
| GO:0034185 | apolipoprotein binding                                                            | 14   | 1  | 0.24  | 0.00564 |
| GO:0005089 | Rho guanyl-nucleotide exchange factor ac...                                       | 62   | 4  | 1.05  | 0.00627 |
| GO:0045295 | gamma-catenin binding                                                             | 12   | 1  | 0.2   | 0.00642 |
| GO:0034483 | heparan sulfate sulfotransferase activit...                                       | 13   | 1  | 0.22  | 0.00646 |
| GO:0043548 | phosphatidylinositol 3-kinase binding                                             | 17   | 0  | 0.29  | 0.00734 |
| GO:0030159 | receptor signaling complex scaffold acti...                                       | 19   | 1  | 0.32  | 0.00768 |
| GO:0031701 | angiotensin receptor binding                                                      | 8    | 1  | 0.14  | 0.00846 |
| GO:0005245 | voltage-gated calcium channel activity                                            | 40   | 1  | 0.68  | 0.00934 |

Results using the Kolmogorov-Smirnov (K-S) test and "weight01" GO decorrelation method. The GO terms are ranked for "weight01" p-values across GO categories (biological process [BP], cellular component [CC] and molecular function [MF]). Legend: Annotated = number of genes in the GO term; Significant = number of significant genes in the GO term; Expected = number of expected by random chance genes in the GO term; Pvalue= p-value in K-S test with "weight01" GO decorrelation.

**S8 Table. Centres contributing FTD samples.**

| <b>Site PI</b>      | <b>Main Institution</b>                                                                                            |
|---------------------|--------------------------------------------------------------------------------------------------------------------|
| Barbara Borroni     | Department of Medical Sciences, Neurological Clinic, University of Brescia, Italy                                  |
| Valeria Novelli*    | Department of Molecular Cardiology, IRCCS Fondazione S. Maugeri, Pavia, Italy                                      |
| Giacomina Rossi     | Neurological Institute Carlo Besta, Milan, Italy                                                                   |
| Daniela Galimberti* | Department of Neurological Sciences, Dino Ferrari Institute, University of Milan, Italy                            |
| Innocenzo Rainero   | Department of Neuroscience, University of Torino, Italy                                                            |
| Luisa Benussi       | Molecular Markers Laboratory, IRCCS Istitute, Fatebenefratelli, Brescia, Italy                                     |
| Benedetta Nacmias   | Department of Neuroscience, Psychology, Drug Research and Child Health,<br>University of Florence, Florence, Italy |
| Amalia Bruni        | Regional Center of Neurogenetic, Lamezia Terme, Italy                                                              |

\* = PI representing multiple centers

Summary of the 8 research groups that contributes samples to this study.
